# Supplementary material for: Assessing generalisability through the use of disease registers: findings from a diabetes cohort study
Source: PubMed Central journal article supplement — BMJ Open. 2011 Aug 27;1(1):e000078. doi: 10.1136/bmjopen-2011-000078 (PMC3191422; doi:10.1136/bmjopen-2011-000078), 2011-08-27
Supplement: bmjopen-2011-000078.draft_revisions.pdf [file bmjopen-2011-000078.draft_revisions.pdf]

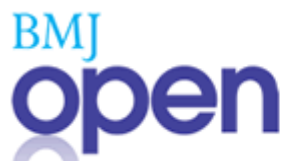

**Assessing generalizability through the use of disease registers: findings from a diabetes cohort study**

|                               |                                                                                                                                                                                                                                                                                                            |
|-------------------------------|------------------------------------------------------------------------------------------------------------------------------------------------------------------------------------------------------------------------------------------------------------------------------------------------------------|
| Journal:                      | <i>BMJ Open</i>                                                                                                                                                                                                                                                                                            |
| Manuscript ID:                | bmjopen-2011-000078                                                                                                                                                                                                                                                                                        |
| Article Type:                 | Research                                                                                                                                                                                                                                                                                                   |
| Date Submitted by the Author: | 18-Feb-2011                                                                                                                                                                                                                                                                                                |
| Complete List of Authors:     | David, Michael; The University of Queensland, School of Population Health<br>Ware, Robert; The University of Queensland, School of Population Health<br>Donald, Maria; The University of Queensland, School of Population Health<br>Alati, Rosa; The University of Queensland, School of Population Health |
| <b>Subject Heading</b>:       | Statistics & research methods                                                                                                                                                                                                                                                                              |
| Keywords:                     | EPIDEMIOLOGY, PUBLIC HEALTH, STATISTICS & RESEARCH METHODS, General diabetes < DIABETES & ENDOCRINOLOGY                                                                                                                                                                                                    |
|                               |                                                                                                                                                                                                                                                                                                            |

SCHOLARONE™  
Manuscripts

# TITLE PAGE

**TITLE:**

Assessing generalizability through the use of disease registers: findings from a diabetes cohort study

**CORRESPONDING AUTOR:**

Name: Michael David  
Postal Address: School of Population Health, The University of Queensland,  
Herston, Queensland 4000, Australia  
E-mail: [michael.david@ugconnect.edu.au](mailto:michael.david@ugconnect.edu.au)  
Tel: +61 733655298  
Fax: +61 733655298

**CO-AUTORS:**

Robert Ware<sup>1</sup>; Maria Donald<sup>1</sup>; and Rosa Alati<sup>1</sup>  
<sup>1</sup> School of Population Health, The University of Queensland, Herston, Queensland,  
Australia

**KEY WORDS and PHRASES:**

Generalizability; Cohort Study; Research Consent; Disease Register

**WORD COUNT:**

2,109

# ABSTRACT

## Objectives

The knowledge of a study population's similarity to the target population allows researchers to assess the generalizability of their results. Often generalizability is assessed through a comparison of baseline characteristics between individuals who did, and did not respond to an invitation to participate in a study. In this prospective population-based cohort, we broadened this assessment by comparing participants with all individuals from a chronic disease register who satisfied the study eligibility criteria but for a number of reasons, such as the absence of consent to be approached for research purposes, did not participate.

## Methods

Data are from The Living with Diabetes Study, a population-based cohort of individuals diagnosed with diabetes mellitus, which commenced in Queensland, Australia in 2008. Individuals were sampled from a federally-funded diabetes register. We compared the characteristics of 3,951 study participants with 10,488 non-participants (individuals who were invited to participate but declined), and with 129,900 non-study registrants (individuals on the register who did not participate in the study).

## Results

Study participants were more likely than non-study registrants to be male, aged 50 to 69, have Type 2 diabetes not requiring insulin, and be non-indigenous Australians.

Study participants were more likely than non-participants to be female, aged 50 to 69 have Type 1 diabetes, have higher socio-economic status, and be non-indigenous Australians.

## Conclusions

The interpretation of a study's generalizability can alter depending on which non-participating group is compared with participants. When assessing generalizability, participants should be compared with the largest possible group of non-participating individuals. When sampling from a disease register, researchers should be wary of the influence of research consent procedures on the register's coverage.

For peer review only

# Article Summary

## Article Focus

- \* to assess the similarity between participants recruited into a study who were sampled from a chronic disease register, with registrants who did not participate in the study
- \* to assess whether the differences between participants and registrants who did not participate are similar to the differences between participants and individuals who were invited to participate but declined

## Key Messages

- \* the generalizability of a study should be assessed by comparing participants with the largest possible group of non-participating individuals
- \* when sampling from a disease register, researchers should be wary of the influence of research consent procedures on the register's coverage

## Strengths and Limitations

- \* information is available for all individuals registered with the chronic disease register
- \* the chronic disease register from which study participants were recruited from has high coverage of target population
- \* only aggregated data was available for registrants who were not invited to participate in the study

## INTRODUCTION

Population-based cohort studies are essential when studying chronic diseases such as diabetes mellitus, as they can offer a comprehensive understanding of disease trajectory over time and allow for multiple subgroup analyses.[1, 2] However the utility of each study's findings depends on whether the results are sufficiently generalizable to the population under investigation. The extent of a study's generalizability, or external validity, depends on how representative of the target population the study's participants are.[3-5] Since information on the target population is often unavailable, investigations concerning the generalizability of population-based cohorts, including those concerning diabetes, have focused on the comparison of baseline characteristics between study participants and non-participants to assess how similar or different they are.[6-9] However, a high degree of similarity between participants and non-participants does not necessarily mean results arising from the study will have good generalizability, as these two groups as a whole might not fully represent the target population due to coverage error.[10, 11] The extent to which findings are generalizable can be assessed by comparing the study participants with the largest possible subset of all diseased individuals in the population being studied, other than participants.[12, 13] The characteristics of this larger group can be accessed through databases such as national chronic disease registers.[6]

1  
2  
3  
4  
5  
6  
7 Chronic disease registries are increasingly used to recruit participants to cohort  
8  
9 studies. One purported advantage of this is to ensure generalizability to the target  
10  
11 population.[14-16] In recent years however, legislative reform concerning privacy  
12  
13 issues has been introduced in many countries, including Australia,[17] which has  
14  
15 restricted research related access to these databases without an individual's consent.  
16  
17 It is possible that this may seriously limit the usefulness of chronic disease registers for  
18  
19 epidemiologic research.[18, 19] This study investigates the generalizability of one  
20  
21 Australian register, the National Diabetes Services Scheme (NDSS) and explores  
22  
23 whether chronic disease registrants who agreed to participate in a research study have  
24  
25 similar characteristics to registrants who satisfied the inclusion criteria but did not  
26  
27 participate. We also compare the characteristics of participants with the  
28  
29 characteristics of individuals who were invited to participate, but declined.  
30  
31  
32  
33  
34  
35  
36  
37  
38  
39

## 40 METHODS

41  
42 The Living with Diabetes Study (LWDS) is a population-based cohort study that began  
43  
44 in 2008. It is an annual study conducted in Queensland, Australia. An individual was  
45  
46 eligible to participate in the study if they had doctor diagnosed Type 1 or 2 diabetes;  
47  
48 were aged at least 18 years and had a valid Queensland postal address. Individuals  
49  
50 were randomly sampled from a federally-funded register of Australians with diabetes,  
51  
52 the NDSS, managed by a non-governmental organisation named Diabetes Australia.  
53  
54  
55  
56  
57  
58  
59  
60

1  
2  
3  
4  
5  
6 The NDSS's coverage of Queenslanders with diabetes is estimated to be between 80%  
7  
8 and 90%.[20] Since 2001, individuals joining the NDSS have been asked whether they  
9  
10 would like to be informed about opportunities to participate in research. Those who  
11  
12 consented to be contacted for research purposes and had a valid postal address were  
13  
14 invited to participate in the LWDS.  
15  
16  
17  
18  
19  
20

21 Selected individuals were invited to participate in the LWDS via a mailed questionnaire.  
22  
23 Information was collected on demographic and socio-economic characteristics, health  
24  
25 behaviour, and health and psychological status. Strategies to maximize participation  
26  
27 included reminder cards, telephone calls and replacement surveys. We categorized  
28  
29 registrants into three mutually exclusive groups: participants, non-participants, and  
30  
31 non-invitees. A participant was defined as an individual who agreed to participate in  
32  
33 the LWDS. A non-participant was defined as an individual who was invited to  
34  
35 participate in the LWDS but declined. A non-invitee was defined as an individual who  
36  
37 was not invited to enrol in the LWDS, either because they did not consent to being  
38  
39 approached by research teams, or because they were not selected during the sampling  
40  
41 process. For comparative purposes, these two latter groups were combined and  
42  
43 defined as non-study registrants. Available individual-level information on participants  
44  
45 and non-participants consisted of sex, age, diabetes status, year of NDSS registration,  
46  
47 postcode and indigenous status. Postcodes were matched to the Australian Bureau of  
48  
49 Statistics' Index of Relative Socio-economic Disadvantage (SEIFA) ranking, and  
50  
51 categorised into tertiles.[21] Only aggregated data was available for non-invitees.  
52  
53  
54  
55  
56  
57  
58  
59  
60



## Data Analysis

For participants, non-participants and non-study registrants we calculated the frequency (percentage) of individuals in each category for sex, age (18-49, 50-69 and 70+ years), diabetes status (Type 2 non-insulin requiring; Type 2 insulin requiring, Type 1), registration year (2001-2003, 2004-2005, 2006-2008), SEIFA tertile and indigenous status. Initially, we used logistic regression analyses to compare participants with non-participants on a univariable basis. We then fitted a series of multivariate logistic regression models in order to investigate the impact of potential confounders and obtain fully-adjusted associations. Individuals were weighted according to the sampling scheme. Finally, we used logistic regression with aggregated data to compare participants with non-study registrants. Results are presented in Table 1 as odds ratios (ORs) and 95% confidence intervals (95% CIs).

## RESULTS

At the 30<sup>th</sup> of June 2008 there were 133,851 registrants in the NDSS who satisfied the LWDS entry criteria, of whom 75,347 (56.3%) did not consent to participate in any research and were excluded (Figure 1). Of the remaining 58,504 registrants, 14,439 were invited to participate in the LWDS, 3,951 of whom agreed. Complete aggregated information was available for all variables except for registration year and SEIFA. Due to NDSS procedural changes and invalid postcodes, 56,264 registrations and 1,711 postcodes were not available for the analyses.

**[Figure 1 to be inserted here]**

1  
2  
3  
4 Table 1 displays a comparison of 3,951 participants and 10,488 non-participants, and a  
5  
6 comparison between participants and 129,900 non-study registrants. After adjusting  
7  
8 for all covariates, individuals were less likely to participate in the LWDS if they were  
9  
10 younger (OR=0.62; 95% CI: 0.55-0.69) or older (0.89; 0.81-0.98) than those aged 50 to  
11  
12 69 years; and had identified themselves as being indigenous Australians (0.61; 0.49-  
13  
14 0.76). Those who were female (1.10; 1.02-1.19); had Type 1 diabetes (1.43; 1.16-1.76)  
15  
16 and resided in middle (1.16; 1.04-1.28) or high SEIFA areas (1.11; 1.01-1.24) were more  
17  
18 likely to participate in the study. A sensitivity analysis was conducted to specifically  
19  
20 investigate the effect of potential confounders. The analyses were re-run six times  
21  
22 with one covariate excluded on each occasion. The only effect estimate seen to vary  
23  
24 substantially was diabetes status. In the model adjusted across all covariates except  
25  
26 age, the odds of being a participant if an individual had Type 1 diabetes was 1.06 (0.87  
27  
28 -1.29) greater than if an individual had Type 2 diabetes and not insulin requiring, while  
29  
30 for the fully adjusted model it was 1.43 (1.16-1.76).  
31  
32  
33  
34  
35  
36  
37  
38  
39  
40

41 The comparative analyses between participants and non-study registrants (Table 1)  
42  
43 shows a number of associational differences when compared to the previous  
44  
45 multivariate analysis. The most noticeable is the relationship between participation  
46  
47 and diabetes status, as it varies not only in strength, but direction. These analyses  
48  
49 show that compared with Type 2 diabetes, no insulin, individuals with Type 2 diabetes,  
50  
51 insulin dependent (0.71; 0.66-0.77), and Type 1 diabetes (0.28; 0.24-0.32) were less  
52  
53 likely to participate. Similarly, the association between participation status  
54  
55  
56  
57  
58  
59  
60

Table 1: Comparison between Living with Diabetes Participants (N=3,951), Non-participants (N=10,488) and Non-study registrants (N=129,900)

|                          | Participants  | Non-Participants | Non-study Registrants | Participants Vs Non-Participants |                      | Participants vs Non-study Registrants |
|--------------------------|---------------|------------------|-----------------------|----------------------------------|----------------------|---------------------------------------|
|                          |               |                  |                       | Crude OR (95% CI)                | Adjusted OR (95% CI) | Crude OR (95% CI)                     |
|                          | N (%)         | N (%)            | N (%)                 |                                  |                      |                                       |
| <b>Sex</b>               |               |                  |                       |                                  |                      |                                       |
| Male                     | 2,176 (55.1%) | 5,885 (56.1%)    | 68,618 (52.8%)        | 1.00                             | 1.00                 | 1.00                                  |
| Female                   | 1,775 (44.9%) | 4,603 (43.9%)    | 61,282 (47.2%)        | 1.04 (0.97 – 1.12)               | 1.10 (1.02 – 1.19)   | 0.91 (0.86 – 0.97)                    |
| <b>Age</b>               |               |                  |                       |                                  |                      |                                       |
| 18-49                    | 618 (15.6%)   | 2,246 (21.4%)    | 21,387 (16.5%)        | 0.65 (0.59 - 0.72)               | 0.62 (0.55 – 0.69)   | 0.71 (0.66 – 0.79)                    |
| 50 - 69                  | 2,375 (60.1%) | 5,649 (53.9%)    | 58,988 (45.4%)        | 1.00                             | 1.00                 | 1.00                                  |
| 70+                      | 958 (24.3%)   | 2,593 (24.7%)    | 49,525 (38.1%)        | 0.88 (0.80 – 0.96)               | 0.89 (0.81 -0.98)    | 0.48 (0.45 – 0.52)                    |
| <b>Diabetes Status</b>   |               |                  |                       |                                  |                      |                                       |
| Type 2 , No Insulin      | 3,023 (76.5%) | 8,024 (76.5%)    | 82,717 (63.7%)        | 1.00                             | 1.00                 | 1.00                                  |
| Type 2, Insulin          | 738 (18.7%)   | 1,986 (18.9%)    | 28,336 (21.8%)        | 0.99 (0.90 – 1.08)               | 1.00 (0.90 – 1.12)   | 0.71 (0.66 – 0.77)                    |
| Type 1, Insulin          | 190 (4.8%)    | 478 (4.6%)       | 18,847 (14.5%)        | 1.06 (0.89 – 1.25)               | 1.43 (1.16 – 1.76)   | 0.28 (0.24 – 0.32)                    |
| <b>Registration Year</b> |               |                  |                       |                                  |                      |                                       |
| 2001 - 2003              | 1,303 (38.0%) | 3,422 (37.0%)    | 28,741 (38.8%)        | 1.00                             | 1.00                 | 1.00                                  |
| 2004 - 2005              | 805 (23.4%)   | 2,239 (24.2%)    | 20,024 (27.0%)        | 0.94 (0.85 – 1.05)               | 0.96 (0.87 – 1.07)   | 0.89 (0.81 – 0.97)                    |
| 2006 - 2008              | 1,325 (38.6%) | 3,580 (38.8%)    | 25,389 (34.2%)        | 0.97 (0.89 – 1.06)               | 1.02 (0.94 – 1.13)   | 1.15 (1.06 – 1.24)                    |
| <b>SEIFA</b>             |               |                  |                       |                                  |                      |                                       |
| Low                      | 830 (21.0%)   | 2,491 (23.8%)    | 27,049 (21.1%)        | 1.00                             | 1.00                 | 1.00                                  |
| Middle                   | 1,543 (39.1%) | 3,883 (37.1%)    | 51,932 (40.5%)        | 1.19 (1.08 – 1.32)               | 1.16 (1.04 – 1.28)   | 0.97 (0.89 – 1.05)                    |
| High                     | 1,572 (39.9%) | 4,100 (39.1%)    | 49,214 (38.4%)        | 1.15 (1.04 – 1.27)               | 1.11 (1.01 – 1.24)   | 1.04 (0.96 – 1.13)                    |
| <b>Indigenous</b>        |               |                  |                       |                                  |                      |                                       |
| No                       | 3,838 (97.2%) | 9,969 (95.1%)    | 124,033 (95.5%)       | 1.00                             | 1.00                 | 1.00                                  |
| Yes                      | 113 (2.8%)    | 519 (4.9%)       | 5,867 (4.5%)          | 0.57 (0.46 – 0.70)               | 0.61 (0.49 – 0.76)   | 0.62 (0.52 – 0.75)                    |

1  
2  
3  
4 and sex was also reversed, with females less likely than males to be participants (0.91;  
5  
6  
7 0.86-0.97). There was no evidence of an association between participation and SEIFA,  
8  
9  
10 but this was not the case with Year of NDSS registration, as registration between 2006  
11  
12 and 2008 was positively associated with participation (1.15; 1.06-1.24), whilst  
13  
14 registration between 2004 and 2005 was inversely associated (0.89; 0.81-0.97).  
15  
16 Associations between participation, and the covariates of age and indigenous status  
17  
18 were similar in direction and magnitude with those found by the multivariate analysis,  
19  
20 except for those aged at least 70 years, which strengthened inversely (0.48; 0.45-0.52).  
21  
22  
23  
24  
25  
26

## 27 **DISCUSSION**

28  
29 The differences observed between the comparisons between participants and non-  
30  
31 participants, and between participants and non-study registrants, confirm that the  
32  
33 extent of a study's generalizability should be established by comparing study  
34  
35 participants to a group of individuals which best represents the target population. In  
36  
37 this study, those who agreed to participate in the LWDS were significantly different  
38  
39 from the non-study registrants over a number of characteristics, with the most notable  
40  
41 being diabetes status. Those with Type 2 diabetes who were insulin requiring, were less  
42  
43 likely to participate in the LWDS. Individuals were less likely to be participants if they  
44  
45 were insulin requiring, with the odds of participation being 29% less likely for those with  
46  
47 Type 2 diabetes who were not insulin requiring, and 72% less likely for those with Type  
48  
49  
50  
51  
52  
53  
54  
55  
56  
57  
58  
59  
60

1  
2  
3  
4  
5  
6 1 diabetes. This parallels the research literature, which suggests that those less healthy  
7  
8 are more likely to be nonresponders than those in better health.[22-24] However, this  
9  
10 was not the case when participants were compared to non-participants, which showed  
11  
12 a strong association also, but was directionally opposite to the previous result; the  
13  
14 adjusted odds of those with Type 1 diabetes participating were 43% greater than those  
15  
16 who had Type 2 diabetes but were not insulin requiring. Such a result indicates that  
17  
18 those with Type 1 diabetes, though less likely to be invited due to consent issues  
19  
20 relating to age of diagnosis,[25] were more likely to participate, once invited.  
21  
22  
23  
24  
25  
26  
27

28 Age and Australian indigenous status were also significantly associated with study  
29  
30 participation, with age also having a negative confounding effect on the LWDS  
31  
32 participation-diabetes status relationship. Unlike the influence of diabetes status, these  
33  
34 associations were similar in direction and strength for both comparative analyses.  
35  
36 Though these results are consistent with the literature,[5, 26, 27] they raise the issue of  
37  
38 representativeness. Disparities in sample balance have the potential to impact  
39  
40 adversely on the estimation of population parameters such as prevalence and incidence  
41  
42 metrics.[9, 28-30]  
43  
44  
45  
46  
47  
48  
49  
50

51 Our initial comparative analysis was between participants and non-participants, and  
52  
53 relied solely on information from those invited to participate in the study. This analysis  
54  
55 failed to identify an important association between diabetes status and participation.  
56  
57  
58  
59  
60

1  
2  
3  
4  
5  
6  
7  
8  
9 This was due to the underrepresentation of individuals with Type 1 diabetes by a factor  
10 of more than three in the group of invitees when compared to the non-study  
11 registrants. Such underrepresentation is the consequence of Type 1 diabetes being  
12 predominately diagnosed during childhood and the NDSS consent protocol,[20] which  
13 does not include a systematic updating of consent status at the age of 18 amongst those  
14 registered as a child. Mandatory informed consent, including parental not only has a  
15 negative effect on participation rates overall, but also weakens the representativeness  
16 of the study sample by producing unbalanced subgroups amongst the study  
17 participants.[25, 31, 32] This was the case because research consent was not a  
18 necessary criterion for an individual to be considered a registrant.  
19  
20  
21  
22  
23  
24  
25  
26  
27  
28  
29  
30  
31  
32  
33  
34  
35

36 The results of our study should be interpreted within the context of some limitations.  
37 Firstly, the generalizability of any study's findings to the target population is very much  
38 dependent on register coverage and the quality of its database.[16, 33, 34] Increased  
39 levels of coverage and data quality lessen the likelihood of biased sample estimates.  
40 [35-37] The coverage of the NDSS is estimated to be between 80% and 90%, which is  
41 higher than most diabetes registers,[20, 33] thus giving it the potential to produce  
42 sampling frames of a higher data quality than most. Secondly, in analyses such as these  
43  
44  
45  
46  
47  
48  
49  
50  
51  
52  
53  
54  
55  
56  
57  
58  
59  
60

1  
2  
3  
4 which only utilize one time-point, there is an inability to maximize the information  
5  
6 provided by time varying determinants of nonresponse such as age.[23, 38, 39] Thirdly,  
7  
8 due to unavailability of individual-level data for non-invitees from the NDSS, it was not  
9  
10 possible to complete a comparative analysis between participants and non-study  
11  
12 registrants that isolated the independent covariate effects after adjustment. It is  
13  
14 possible that individual data would have resulted in the associations between  
15  
16 participation and a number of covariates being more similar to those found when non-  
17  
18 participants were used as the reference group.  
19  
20  
21  
22  
23  
24  
25

26 Our findings illustrate that the standard procedure of comparing study participants and  
27  
28 non-participants in assessing a study's generalizability can be compromised by the issue  
29  
30 of research consent when disease registers are used as a source of recruitment.  
31  
32

33 Whenever possible, a clearer assessment should be sought by extending this standard  
34  
35 practice to a secondary analysis by sourcing the largest possible reference group that is  
36  
37 inclusive of non-participants. For prospective population-based cohort studies,  
38  
39 researchers should endeavour to source a group that contains all potential participants  
40  
41 who satisfied inclusion criteria, but have not been able to participate. As findings can  
42  
43 be influenced by the issue of research consent; where available, chronic disease  
44  
45 registers should be utilized fully in any assessment of generalizability.  
46  
47  
48  
49  
50  
51  
52  
53  
54  
55  
56  
57  
58  
59  
60

## ACKNOWLEDGMENTS

We would like to especially thank the participants of the Living with Diabetes Study, without their participation this research would not be possible. Also, our sincere thanks go to Diabetes Australia and the National Diabetes Scheme for working with us to make it possible to recruit participants to the Living with Diabetes Study. In addition, we would also like to thank all members of the Living with Diabetes Study team for their ongoing support and input.

## COMPETING INTERESTS

There are no conflicts of interest with respect to this study as outlined in this paper.

## CONTRIBUTORSHIP STATEMENT

I declare that I conceived the study and was the primary author responsible for this final version. In addition, Dr. Robert Ware assisted and advised on conceptualisation, statistical analysis and reviewing, while Dr. Rosa Alati and Dr. Maria Donald assisted in the review and editing of the final version of this paper.

## FUNDING

We are grateful to both the Australian Research Council and Queensland Health for providing funding that enabled this study to be commenced at the data collection stage and finalized by the completion of this paper.



## REFERENCES

1. Tabák AG, Jokela M, Akbaraly TN, Brunner EJ, Kivimäki M, Witte DR. Trajectories of glycaemia, insulin sensitivity, and insulin secretion before diagnosis of type 2 diabetes: an analysis from the Whitehall II study. *The Lancet*. 2009;373(9682):2215-21.
2. Mrena S, Virtanen SM, Laippala P, Kulmala P, Hannila ML, Akerblom HK, et al. Models for predicting type 1 diabetes in siblings of affected children. *Diabetes care*. 2006;29(3):662-7.
3. Szklo M. Population-based cohort studies. *Epidemiologic reviews*. 1998;20(1):81.
4. Deeg D. Attrition in longitudinal population studies: Does it affect the generalizability of the findings? An introduction to the series. *Journal of clinical epidemiology*. 2002;55(3):213-5.
5. Drivsholm T, Eplov L, Davidsen M, Jørgensen T, Ibsen H, Hollnagel H, et al. Representativeness in population-based studies: a detailed description of non-response in a Danish cohort study. *Scandinavian journal of public health*. 2006;34(6):623-31.
6. Sim J. The external validity of group comparative and single system studies. *Physiotherapy*. 1995;81(5):263-70.
7. Gerrish K, Lacey A, editors. *The Research Process in Nursing*. 6th Edition ed. Chichester: John Wiley and Sons; 2010.
8. Barry A. How attrition impacts the internal and external validity of longitudinal research. *Journal of School Health*. 2005;75(7):4.

- 1  
2  
3  
4 9. Livingston PM, Lee SE, McCarty CA, Taylor HR. A comparison of participants with  
5  
6 non-participants in a population-based epidemiologic study: The Melbourne  
7  
8 Visual Impairment Project. *Ophthalmic epidemiology*. 1997;42(2):73-81.  
9
- 10  
11 10. Groves R, Dillman D, Eltinge J, Little R, Biemer P, Lyberg L, et al. Survey  
12  
13 methodology. *Technometrics*. 2005;47(2):246-  
14
- 15  
16 11. Kalsbeek W, Heiss G. Building bridges between populations and samples in  
17  
18 epidemiological studies. *Annual Review of Public Health*. 2000;21(1):147-69.  
19
- 20  
21 12. Boardman H, Thomas E, Ogden H, Croft P, Millson D. A method to determine if  
22  
23 consenters to population surveys are representative of the target study  
24  
25 population. *Journal of Public Health*. 2005;27(2):212.  
26  
27
- 28  
29 13. Dekkers OM, von Elm E, Algra A, Romijn JA, Vandembroucke JP. How to assess  
30  
31 the external validity of therapeutic trials: a conceptual approach. *International*  
32  
33 *Journal of Epidemiology*. 2010;39(1):89-94.  
34
- 35  
36 14. Torner A, Duberg AS, Dickman P, Svensson A. A Proposed Method to Adjust for  
37  
38 Selection Bias in Cohort Studies. *American Journal of Epidemiology*.  
39  
40 2010;171(5):602-8.  
41  
42
- 43  
44 15. Jonsson S, Hedblad B, Engstrom G, Nilsson P, Berglund G, Janzon I. Influence of  
45  
46 obesity on cardiovascular risk. Twenty-three-year follow-up of 22 025 men from  
47  
48 an urban Swedish population. *International Journal of Obesity*. 2002;26(8):1046-  
49  
50 53.  
51  
52
- 53  
54 16. Brewster D, Stockton D, Harvey J, Mackay M. Reliability of cancer registration  
55  
56 data in Scotland, 1997. *European Journal of Cancer*. 2002;38(3):414-7.  
57  
58  
59  
60

- 1  
2  
3  
4 17. Molster C, Bower C, O'Leary P. Community attitudes to the collection and use of  
5  
6 identifiable data for health research—is it an invasion of privacy? Australian and  
7  
8 New Zealand Journal of Public Health. 2007;31(4):313-7.  
9
- 10  
11 18. Gershon A, Tu J. The effect of privacy legislation on observational research.  
12  
13 Canadian Medical Association Journal. 2008;178(7):871.  
14
- 15  
16 19. Rothman K. The rise and fall of epidemiology, 1950 2000 AD. New England  
17  
18 Journal of Medicine. 1981;304(10):600-2.  
19
- 20  
21 20. Australian Institute of Health and Welfare. Diabetes prevalence in Australia: an  
22  
23 assessment of national data coverage. Diabetes series no14. Canberra: AIHW;  
24  
25 2009.  
26
- 27  
28 21. Australian Bureau of Statistics. Census of Population and Housing: Socio-  
29  
30 Economic Indexes for Area's (SEIFA). Canberra: ABS; 2004.  
31
- 32  
33 22. Alonso A, Seguí-Gómez M, de Irala J, Sánchez-Villegas A, Beunza J, Martínez-  
34  
35 Gonzalez M. Predictors of follow-up and assessment of selection bias from  
36  
37 dropouts using inverse probability weighting in a cohort of university graduates.  
38  
39 European journal of epidemiology. 2006;21(5):351-8.  
40
- 41  
42 23. Coley N, Gardette V, Toulza O, Gillette-Guyonnet S, Cantet C, Nourhashemi F, et  
43  
44 al. Predictive factors of attrition in a cohort of Alzheimer disease patients.  
45  
46 Neuroepidemiology. 2008;31(2):69-79.  
47
- 48  
49 24. Holden L, Ware R, Passey M. Characteristics of nonparticipants differed based on  
50  
51 reason for nonparticipation: a study involving the chronically ill. Journal of  
52  
53 clinical epidemiology. 2008;61(7):728-32.  
54
- 55  
56 25. Galea S, Tracy M. Participation rates in epidemiologic studies. Annals of  
57  
58 epidemiology. 2007;17(9):643-53.  
59  
60

- 1  
2  
3  
4 26. Odierna D, Schmidt L. The Effects of Failing to Include Hard-to-Reach  
5 Respondents in Longitudinal Surveys. *American journal of public health.*  
6 2009;99(8):1515.  
7  
8  
9  
10  
11 27. Hazell M, Morris J, Linehan M, Frank P, Frank T. Factors influencing the response  
12 to postal questionnaire surveys about respiratory symptoms. *Prim Care Respir J.*  
13 2009;18(3):165-70.  
14  
15  
16  
17  
18 28. Ware R, Williams G, Aird R. Participants who left a multiple-wave cohort study  
19 had similar baseline characteristics to participants who returned. *Annals of*  
20 *epidemiology.* 2006;16(11):820-3.  
21  
22  
23  
24  
25  
26 29. Brilleman S, Pachana N, Dobson A. The impact of attrition on the  
27 representativeness of cohort studies of older people. *BMC Medical Research*  
28 *Methodology.* 2010;10(1):71.  
29  
30  
31  
32  
33 30. Watson N, Wooden M. Identifying factors affecting longitudinal survey response.  
34 In: Lynn P, editor. *Methodology of Longitudinal Surveys.* New York: Wiley; 2009.  
35 p. 157-81.  
36  
37  
38  
39  
40  
41 31. Rojas NL, Sherrit L, Harris S, Knight JR. The Role of Parental Consent in  
42 Adolescent Substance Use Research. *Journal of Adolescent Health.*  
43 2008;42(2):192-7.  
44  
45  
46  
47  
48  
49 32. Kho ME, Duffett M, Willison DJ, Cook DJ, Brouwers MC. Written informed  
50 consent and selection bias in observational studies using medical records:  
51 systematic review. *British Medical Journal.* 2009;338.  
52  
53  
54  
55  
56 33. Joshy G, Simmons D. Diabetes information systems: A rapidly emerging support  
57 for diabetes surveillance and care. *Diabetes Technology & Therapeutics.*  
58 2006;8(5):587-97.  
59  
60

- 1  
2  
3  
4 34. Nickelsen T. Data validity and coverage in the Danish National Health Registry. A  
5 literature review. *Ugeskrift for laeger*. 2001;164(1):33.  
6  
7  
8  
9 35. Choi B, Pak A. Understanding and minimizing epidemiologic bias in public health  
10 research. *Revue Canadienne De Sante Publique*. 2005;96(4).  
11  
12  
13 36. Biemer P, Lyberg L, Wiley J. Introduction to survey quality: Wiley Online Library;  
14 2003.  
15  
16  
17  
18 37. Blumberg S, Luke J. Coverage bias in traditional telephone surveys of low-income  
19 and young adults. *Public Opinion Quarterly*. 2007;71(5):734.  
20  
21  
22  
23 38. Siddiqui O, Flay B, Hu F. Factors affecting attrition in a longitudinal smoking  
24 prevention study. *Preventive Medicine*. 1996;25(5):554-60.  
25  
26  
27  
28 39. Che YH, Assanangkornchai S, McNeil E, Chongsuvivatwong V, Li JH, Geater A, et  
29 al. Predictors of early dropout in methadone maintenance treatment program in  
30 Yunnan province, China. *Drug and Alcohol Review*. 2010;29(3):263-70.  
31  
32  
33  
34  
35  
36  
37  
38  
39  
40  
41  
42  
43  
44  
45  
46  
47  
48  
49  
50  
51  
52  
53  
54  
55  
56  
57  
58  
59  
60

1 STROBE Statement—Checklist of items that should be included in reports of *cohort studies*

|                              | No | Recommendation                                                                                                                                                                                            |
|------------------------------|----|-----------------------------------------------------------------------------------------------------------------------------------------------------------------------------------------------------------|
| <b>Title and abstract</b>    | 1  | (a) Indicate the study's design with a commonly used term in the title or the abstract<br>(See pages 1, 2 & 3 of manuscript)                                                                              |
|                              |    | (b) Provide in the abstract an informative and balanced summary of what was done and what was found<br>(See pages 2 & 3 of manuscript)                                                                    |
| <b>Introduction</b>          |    |                                                                                                                                                                                                           |
| Background/rationale         | 2  | Explain the scientific background and rationale for the investigation being reported<br>(See paragraph 1)                                                                                                 |
| Objectives                   | 3  | State specific objectives, including any prespecified hypotheses<br>(See paragraph 2)                                                                                                                     |
| <b>Methods</b>               |    |                                                                                                                                                                                                           |
| Study design                 | 4  | Present key elements of study design early in the paper<br>(See paragraph 2)                                                                                                                              |
| Setting                      | 5  | Describe the setting, locations, and relevant dates, including periods of recruitment, exposure, follow-up, and data collection<br>(See paragraph 1)                                                      |
| Participants                 | 6  | (a) Give the eligibility criteria, and the sources and methods of selection of participants. Describe methods of follow-up<br>(See paragraph 1 & data only collected from baseline survey)                |
|                              |    | (b) For matched studies, give matching criteria and number of exposed and unexposed<br>(Not applicable)                                                                                                   |
| Variables                    | 7  | Clearly define all outcomes, exposures, predictors, potential confounders, and effect modifiers. Give diagnostic criteria, if applicable<br>(See paragraph 2)                                             |
| Data sources/<br>measurement | 8* | For each variable of interest, give sources of data and details of methods of assessment (measurement). Describe comparability of assessment methods if there is more than one group<br>(See paragraph 1) |
| Bias                         | 9  | Describe any efforts to address potential sources of bias<br>(See paragraph 1 i.e. randomly sampled from disease register)                                                                                |
| Study size                   | 10 | Explain how the study size was arrived at<br>(Not reported in this study as outcomes associated with diabetes not an objective of this paper)                                                             |
| Quantitative variables       | 11 | Explain how quantitative variables were handled in the analyses. If applicable, describe which groupings were chosen and why<br>(See paragraph 3)                                                         |
| Statistical methods          | 12 | (a) Describe all statistical methods, including those used to control for confounding<br>(Multivariate logistic analysis was used to control for potential confounders i.e. see paragraph 3)              |
|                              |    | (b) Describe any methods used to examine subgroups and interactions<br>(See paragraph 3)                                                                                                                  |
|                              |    | (c) Explain how missing data were addressed<br>(Due to study's objectives, there was no need to incorporate or utilize any statistical adjustment for missing data).                                      |
|                              |    | (d) If applicable, explain how loss to follow-up was addressed<br>(See paragraph 2, for strategies to maximize participation at baseline)                                                                 |

|                          |     |                                                                                                                                                                                                                                                                                                                                                                                                                                                                                                                |
|--------------------------|-----|----------------------------------------------------------------------------------------------------------------------------------------------------------------------------------------------------------------------------------------------------------------------------------------------------------------------------------------------------------------------------------------------------------------------------------------------------------------------------------------------------------------|
|                          |     | (e) Describe any sensitivity analyses<br>(See paragraph 2 in Results section)                                                                                                                                                                                                                                                                                                                                                                                                                                  |
| <b>Results</b>           |     |                                                                                                                                                                                                                                                                                                                                                                                                                                                                                                                |
| Participants             | 13* | (a) Report numbers of individuals at each stage of study—eg numbers potentially eligible, examined for eligibility, confirmed eligible, included in the study, completing follow-up, and analysed<br>(See Figure 1)<br>(b) Give reasons for non-participation at each stage<br>(See paragraphs 2&3 for associations between baseline characteristics and participation status)<br>(c) Consider use of a flow diagram<br>(See Figure 1)                                                                         |
| Descriptive data         | 14* | (a) Give characteristics of study participants (eg demographic, clinical, social) and information on exposures and potential confounders<br>(See Table 1)<br>(b) Indicate number of participants with missing data for each variable of interest<br>(See Table 1)<br>(c) Summarise follow-up time (eg, average and total amount)<br>(Not applicable as only participation at baseline/wave 1 considered)                                                                                                       |
| Outcome data             | 15* | Report numbers of outcome events or summary measures over time<br>(See Table 1)                                                                                                                                                                                                                                                                                                                                                                                                                                |
| Main results             | 16  | (a) Give unadjusted estimates and, if applicable, confounder-adjusted estimates and their precision (eg, 95% confidence interval). Make clear which confounders were adjusted for and why they were included<br>(See Table 1 and paragraph 2)<br>(b) Report category boundaries when continuous variables were categorized<br>(See paragraph 3 in Methods and Table 1)<br>(c) If relevant, consider translating estimates of relative risk into absolute risk for a meaningful time period<br>(Not applicable) |
| Other analyses           | 17  | Report other analyses done—eg analyses of subgroups and interactions, and sensitivity analyses<br>(See paragraph 2)                                                                                                                                                                                                                                                                                                                                                                                            |
| <b>Discussion</b>        |     |                                                                                                                                                                                                                                                                                                                                                                                                                                                                                                                |
| Key results              | 18  | Summarise key results with reference to study objectives<br>(See paragraph 1, 2 & 3)                                                                                                                                                                                                                                                                                                                                                                                                                           |
| Limitations              | 19  | Discuss limitations of the study, taking into account sources of potential bias or imprecision. Discuss both direction and magnitude of any potential bias<br>(See paragraph 4)                                                                                                                                                                                                                                                                                                                                |
| Interpretation           | 20  | Give a cautious overall interpretation of results considering objectives, limitations, multiplicity of analyses, results from similar studies, and other relevant evidence<br>(See paragraphs 2,3 & 4)                                                                                                                                                                                                                                                                                                         |
| Generalisability         | 21  | Discuss the generalisability (external validity) of the study results<br>(See paragraph 4)                                                                                                                                                                                                                                                                                                                                                                                                                     |
| <b>Other information</b> |     |                                                                                                                                                                                                                                                                                                                                                                                                                                                                                                                |
|                          | 22  | Give the source of funding and the role of the funders for the present study and, if                                                                                                                                                                                                                                                                                                                                                                                                                           |

1  
2  
3  
4  
5  
6  
7  
8  
9  
10  
11  
12  
13  
14  
15  
16  
17  
18  
19  
20  
21  
22  
23  
24  
25  
26  
27  
28  
29  
30  
31  
32  
33  
34  
35  
36  
37  
38  
39  
40  
41  
42  
43  
44  
45  
46  
47  
48  
49  
50  
51  
52  
53  
54  
55  
56  
57  
58  
59  
60

---

|         |                                                                                                                   |
|---------|-------------------------------------------------------------------------------------------------------------------|
| Funding | applicable, for the original study on which the present article is based<br>(See funding statement in manuscript) |
|---------|-------------------------------------------------------------------------------------------------------------------|

---

\*Give information separately for exposed and unexposed groups.

**Note:** An Explanation and Elaboration article discusses each checklist item and gives methodological background and published examples of transparent reporting. The STROBE checklist is best used in conjunction with this article (freely available on the Web sites of PLoS Medicine at <http://www.plosmedicine.org/>, Annals of Internal Medicine at <http://www.annals.org/>, and Epidemiology at <http://www.epidem.com/>). Information on the STROBE Initiative is available at <http://www.strobe-statement.org>.

For peer review only



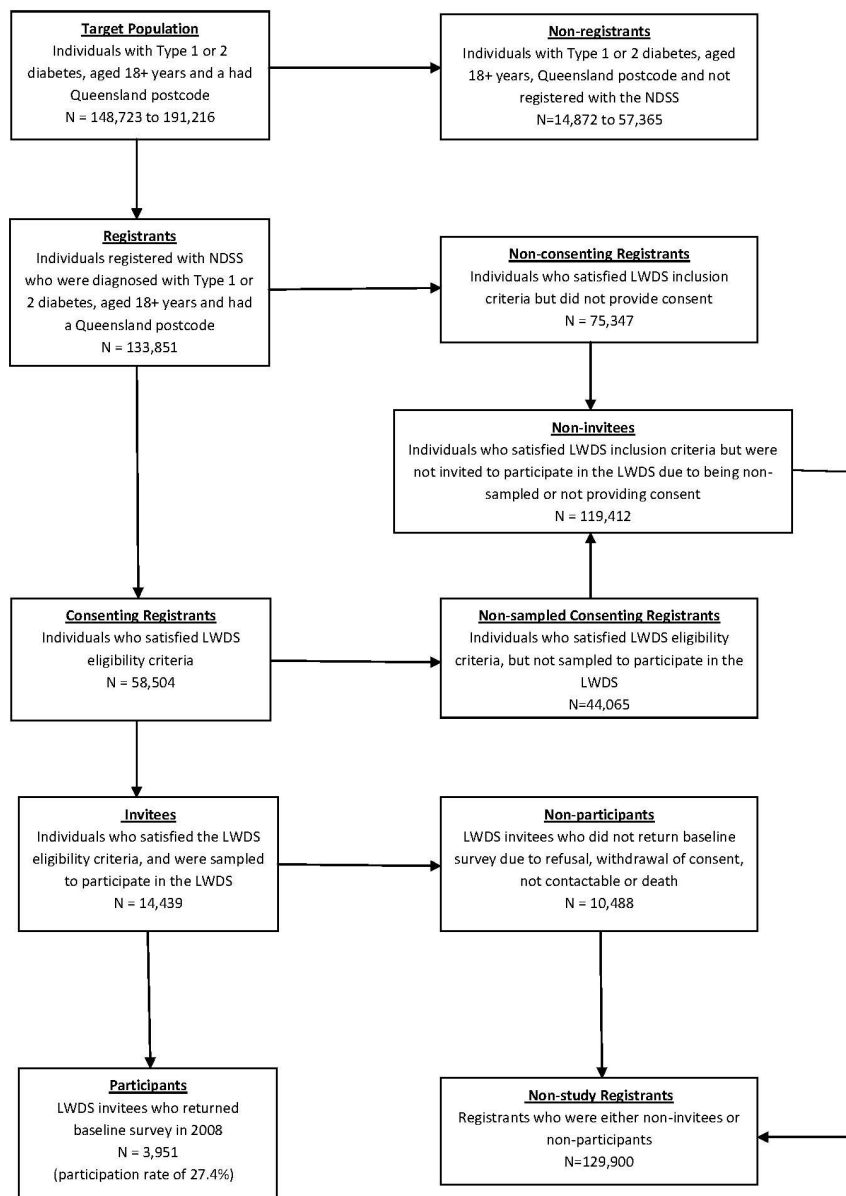

Participation flowchart  
174x241mm (200 x 200 DPI)

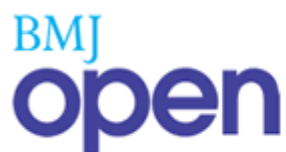

**Assessing generalizability through the use of disease registers: findings from a diabetes cohort study**

|                               |                                                                                                                                                                                                                                                                                                            |
|-------------------------------|------------------------------------------------------------------------------------------------------------------------------------------------------------------------------------------------------------------------------------------------------------------------------------------------------------|
| Journal:                      | <i>BMJ Open</i>                                                                                                                                                                                                                                                                                            |
| Manuscript ID:                | bmjopen-2011-000078.R1                                                                                                                                                                                                                                                                                     |
| Article Type:                 | Research                                                                                                                                                                                                                                                                                                   |
| Date Submitted by the Author: | 11-May-2011                                                                                                                                                                                                                                                                                                |
| Complete List of Authors:     | David, Michael; The University of Queensland, School of Population Health<br>Ware, Robert; The University of Queensland, School of Population Health<br>Donald, Maria; The University of Queensland, School of Population Health<br>Alati, Rosa; The University of Queensland, School of Population Health |
| <b>Subject Heading</b>:       | Statistics & research methods                                                                                                                                                                                                                                                                              |
| Keywords:                     | EPIDEMIOLOGY, PUBLIC HEALTH, STATISTICS & RESEARCH METHODS, GENERAL DIABETES < DIABETES & ENDOCRINOLOGY                                                                                                                                                                                                    |
|                               |                                                                                                                                                                                                                                                                                                            |

SCHOLARONE™  
Manuscripts

# TITLE PAGE

**TITLE:**

Assessing generalizability through the use of disease registers: findings from a diabetes cohort study

**CORRESPONDING AUTHOR:**

Name: Michael David  
Postal Address: School of Population Health, The University of Queensland,  
Herston, Queensland 4000, Australia  
E-mail: [michael.david@ugconnect.edu.au](mailto:michael.david@ugconnect.edu.au)  
Tel: +61 733655298  
Fax: +61 733655298

**CO-AUTHORS:**

Robert Ware<sup>1</sup>; Maria Donald<sup>1</sup>; and Rosa Alati<sup>1</sup>  
<sup>1</sup> School of Population Health, The University of Queensland, Herston, Queensland,  
Australia

**KEY WORDS and PHRASES:**

Generalizability; Cohort Study; Research Consent; Disease Register

**WORD COUNT:**

**2,175**

# ABSTRACT

## Objectives

The knowledge of a study population's similarity to the target population allows researchers to assess the generalizability of their results. Often generalizability is assessed through a comparison of baseline characteristics between individuals who did, and did not respond to an invitation to participate in a study. In this prospective population-based cohort, we broadened this assessment by comparing participants with all individuals from a chronic disease register who satisfied the study eligibility criteria but for a number of reasons, such as the absence of consent to be approached for research purposes, did not participate.

## Methods

Data are from The Living with Diabetes Study, a population-based cohort of individuals diagnosed with diabetes mellitus, which commenced in Queensland, Australia in 2008. Individuals were sampled from a federally-funded diabetes register. We compared the characteristics of 3,951 study participants with 10,488 non-participants (individuals who were invited to participate but declined), and with 129,900 non-study registrants (individuals on the register who did not participate in the study).

## Results

Study participants were more likely than non-study registrants to be male, aged 50 to 69, have Type 2 diabetes not requiring insulin, be recently registered and be non-indigenous Australians. Study participants were more likely than non-participants to be aged 50 to 69, have Type 1 diabetes, and be non-indigenous Australians.

## Conclusions

The interpretation of a study's generalizability can alter depending on which non-participating group is compared with participants. When assessing generalizability, participants should be compared with the largest possible group of non-participating individuals. When sampling from a disease register, researchers should be wary of the influence of research consent procedures on the register's coverage.

For peer review only

# Article Summary

## Article Focus

- \* to assess the similarity between participants recruited into a study who were sampled from a chronic disease register, with registrants who did not participate in the study
- \* to assess whether the differences between participants and registrants who did not participate are similar to the differences between participants and individuals who were invited to participate but declined

## Key Messages

- \* the generalizability of a study should be assessed by comparing participants with the largest possible group of non-participating individuals
- \* when sampling from a disease register, researchers should be wary of the influence of research consent procedures on the register's coverage

## Strengths and Limitations

- \* information is available for all individuals registered with the chronic disease register
- \* the chronic disease register from which study participants were recruited from has high coverage of target population
- \* only aggregated data was available for registrants who were not invited to participate in the study

## INTRODUCTION

Population-based cohort studies are essential when studying chronic diseases such as diabetes mellitus, as they can offer a comprehensive understanding of disease trajectory over time and allow for multiple subgroup analyses.[1, 2] However the utility of each study's findings depends on whether the results are sufficiently generalizable to the population under investigation. The extent of a study's generalizability, or external validity, depends on how representative of the target population the study's participants are.[3-5] Since information on the target population is often unavailable, investigations concerning the generalizability of population-based cohorts, including those concerning diabetes, have focused on the comparison of baseline characteristics between study participants and non-participants to assess how similar or different they are.[6-9] However, a high degree of similarity between participants and non-participants does not necessarily mean results arising from the study will have good generalizability, as these two groups as a whole might not fully represent the target population due to coverage error.[10, 11] The extent to which findings are generalizable can be assessed by comparing the study participants with the largest possible subset of all diseased individuals in the population being studied, other than participants.[12, 13] The characteristics of this larger group can be accessed through databases such as national chronic disease registers.[6]

1  
2  
3  
4  
5  
6  
7 Chronic disease registries are increasingly used to recruit participants to cohort  
8  
9 studies. One purported advantage of this is to ensure generalizability to the target  
10  
11 population.[14-16] In recent years however, legislative reform concerning privacy  
12  
13 issues has been introduced in many countries, including Australia,[17] which has  
14  
15 restricted research related access to these databases without an individual's consent.  
16  
17 It is possible that this may seriously limit the usefulness of chronic disease registers for  
18  
19 epidemiologic research.[18, 19] This study investigates the generalizability of one  
20  
21 Australian register, the National Diabetes Services Scheme (NDSS) and explores  
22  
23 whether chronic disease registrants who agreed to participate in a research study have  
24  
25 similar characteristics to registrants who satisfied the inclusion criteria but did not  
26  
27 participate. We also compare the characteristics of participants with the  
28  
29 characteristics of individuals who were invited to participate, but declined.  
30  
31  
32  
33  
34  
35  
36  
37  
38  
39

## 40 METHODS

41  
42 The Living with Diabetes Study (LWDS) is a population-based cohort study that began  
43  
44 in Queensland, Australia in 2008. An individual was eligible to participate in the study  
45  
46 if they had doctor diagnosed Type 1 or 2 diabetes; were aged at least 18 years and had  
47  
48 a valid Queensland postal address. Individuals were randomly sampled from a  
49  
50 federally-funded register of Australians with diabetes, the NDSS, managed by a non-  
51  
52 governmental organisation named Diabetes Australia. The NDSS's coverage of  
53  
54 Queenslanders with diabetes is estimated to be between 80% and 90%.[20] Since  
55  
56  
57  
58  
59  
60



1  
2  
3  
4  
5  
6 2001, individuals joining the NDSS have been asked whether they would like to be  
7  
8 informed about opportunities to participate in research. Those who consented to be  
9  
10 contacted for research purposes and had a valid postal address were invited to  
11  
12 participate in the LWDS. **The LWDS sampling design specified three target locations**  
13  
14 **of policy interest to be oversampled: an outer metropolitan area; a new suburban**  
15  
16 **development and a coastal agricultural community. All eligible individuals from the**  
17  
18 **three locations were invited to participate, in addition to approximately one in six**  
19  
20 **eligible individuals from the rest of Queensland.**  
21  
22  
23  
24  
25  
26  
27

28 Selected individuals were invited to participate in the LWDS via a mailed  
29  
30 questionnaire. Information was collected on demographic and socio-economic  
31  
32 characteristics, health behaviour, and health and psychological status. Strategies to  
33  
34 maximize participation included reminder cards, telephone calls and replacement  
35  
36 surveys. We categorized registrants into **four mutually exclusive groups: participants,**  
37  
38 **non-participants, non-sampled consenting registrants and non-consenting**  
39  
40 **registrants. A participant was defined as an individual who agreed to participate in**  
41  
42 **the LWDS. A non-participant was defined as an individual who was invited to**  
43  
44 **participate in the LWDS but declined. Individuals in either of these groups were**  
45  
46 **defined as invitees. A non-sampled consenting registrant was defined as an**  
47  
48 **individual who agreed to participate in the LWDS but was not selected during the**  
49  
50 **sampling process. A non-consenting registrant was defined as an individual who had**  
51  
52  
53  
54  
55  
56  
57  
58  
59  
60

1  
2  
3  
4  
5  
6  
7  
8  
9 **not agreed to participate in the LWDS. Individuals in either of these two latter groups**  
10 **were defined as non-invitees. Initially, participants were compared to non-**  
11 **participants (the reference group). For a secondary comparative analysis, the**  
12 **reference group was expanded by the inclusion of non-invitees. Those in this**  
13 **expanded reference group were defined as non-study registrants. Figure 1 depicts**  
14 **the relationships that exist between these groups by way of a schematic diagram.**

15  
16 Available individual-level information on participants and non-participants consisted of  
17 sex, age, diabetes status, year of NDSS registration, postcode and indigenous status.  
18 Postcodes were matched to the Australian Bureau of Statistics' Index of Relative Socio-  
19 economic Disadvantage (SEIFA) ranking, and categorised into tertiles.[21] **Due to**  
20 **privacy and research consent issues, only covariate aggregate data was available for**  
21 **non-invitees. Ethics approval was obtained from the University of Queensland's**  
22 **Behavioural and Social Sciences Ethical Review Committee.**

23  
24  
25  
26  
27  
28  
29  
30  
31  
32  
33  
34  
35  
36  
37  
38  
39  
40  
41  
42  
43  
44 **[Figure 1 to be inserted here]**  
45  
46  
47

#### 48 **Data Analysis**

49 For participants, non-participants and non-study registrants we calculated the  
50 frequency (percentage) of individuals in each category for sex, age (18-49, 50-69 and  
51 70+ years), diabetes status (Type 2 non-insulin requiring; Type 2 insulin requiring, Type  
52  
53  
54  
55  
56  
57  
58  
59  
60

1  
2  
3  
4  
5  
6 1), registration year (2001-2003, 2004-2005, 2006-2008), SEIFA tertile and indigenous  
7  
8 status. Initially, we used logistic regression analyses to compare participants with non-  
9  
10 participants on a univariable basis. We then fitted a series of multivariate logistic  
11  
12 regression models in order to investigate the impact of potential confounders and  
13  
14 obtain fully-adjusted associations. Analyses were weighted according to the sampling  
15  
16 scheme. **As individual-level data was not available for all individuals in the reference**  
17  
18 **group of non-study registrants, we used univariable logistic regression with**  
19  
20 **aggregate data to compare participants with non-study registrants. Results for each**  
21  
22 **of the analyses are** presented in Table 1 as odds ratios (ORs) and 95% confidence  
23  
24 intervals (95% CIs).  
25  
26  
27  
28  
29  
30  
31  
32  
33

## 34 RESULTS

35  
36 At the 30<sup>th</sup> of June 2008 there were 133,851 registrants in the NDSS who satisfied the  
37  
38 LWDS entry criteria, of whom 75,347 (56.3%) did not consent to participate in any  
39  
40 research and were excluded (**Figure 2**). Of the remaining 58,504 registrants, 14,439  
41  
42 were invited to participate in the LWDS; 3,951 of whom agreed. Complete aggregate  
43  
44 information was available for all variables except for registration year and SEIFA. Due  
45  
46 to NDSS procedural changes and invalid postcodes, 56,264 registrations and 1,711  
47  
48 postcodes were not available for the analyses.  
49  
50  
51  
52  
53  
54  
55

56 **[Figure 2 to be inserted here]**  
57  
58  
59  
60

1  
2  
3  
4  
5  
6  
7  
8  
9  
10  
11 Table 1 displays a comparison of 3,951 participants and 10,488 non-participants, and a  
12 comparison between participants and 129,900 non-study registrants. After adjusting  
13 for all covariates, individuals were less likely to participate in the LWDS if they were  
14 younger (**OR=0.63; 95% CI: 0.55-0.71**) or older (**0.89; 0.81-0.99**) than those aged 50 to  
15 69 years; and had identified themselves as being indigenous Australians (0.61; **0.48-**  
16 **0.77**). Those who had Type 1 diabetes (**1.50; 1.19-1.90**) were more likely to participate  
17 in the study. A sensitivity analysis was conducted to specifically investigate the effect  
18 of potential confounders. The analyses were re-run six times with one covariate  
19 excluded on each occasion. The only effect estimate seen to vary substantially was  
20 diabetes status. In the model adjusted across all covariates except age (**not shown in**  
21 **Table 1**), the odds of being a participant if an individual had Type 1 diabetes was **1.13**  
22 (**0.91 –1.42**) greater than if an individual had Type 2 diabetes and not insulin requiring,  
23 while for the fully adjusted model it was **1.50 (1.19–1.90)**.

24  
25  
26  
27  
28  
29  
30  
31  
32  
33  
34  
35  
36  
37  
38  
39  
40  
41  
42  
43  
44  
45  
46 The comparative analyses between participants and non-study registrants (Table 1)  
47 shows a number of associational differences when compared to the previous  
48 multivariate analysis. The most noticeable is the relationship between participation  
49 and diabetes status, as it varies not only in strength, but direction. These analyses  
50  
51  
52  
53  
54  
55  
56  
57  
58  
59  
60

Table 1: Comparison between Living with Diabetes Participants, Non-participants and Non-study registrants.

|                          | Participants     | Non-participants  | Non-study Registrants | <u>Participants Vs Non-participants</u> |                              | <u>Participants Vs Non-study Registrants</u> |
|--------------------------|------------------|-------------------|-----------------------|-----------------------------------------|------------------------------|----------------------------------------------|
|                          | <b>N = 3,951</b> | <b>N = 10,488</b> | <b>N = 129,900</b>    | <u>Crude OR (95% CI)</u>                | <u>Adjusted OR (95% CI)*</u> | <u>Crude OR (95% CI)</u>                     |
| <b>Sex</b>               |                  |                   |                       |                                         |                              |                                              |
| Male                     | 2,176 (55.1%)    | 5,885 (56.1%)     | 68,618 (52.8%)        | <b>1.00</b>                             | <b>1.00</b>                  | 1.00                                         |
| Female                   | 1,775 (44.9%)    | 4,603 (43.9%)     | 61,282 (47.2%)        | <b>1.01 (0.93 – 1.10)</b>               | <b>1.07 (0.98 – 1.17)</b>    | 0.91 (0.86 – 0.97)                           |
| <b>Age</b>               |                  |                   |                       |                                         |                              |                                              |
| 18-49                    | 618 (15.6%)      | 2,246 (21.4%)     | 21,387 (16.5%)        | <b>0.67 (0.60 - 0.75)</b>               | <b>0.63 (0.55 – 0.71)</b>    | 0.71 (0.66 – 0.79)                           |
| 50 - 69                  | 2,375 (60.1%)    | 5,649 (53.9%)     | 58,988 (45.4%)        | <b>1.00</b>                             | <b>1.00</b>                  | 1.00                                         |
| 70+                      | 958 (24.3%)      | 2,593 (24.7%)     | 49,525 (38.1%)        | <b>0.88 (0.80 – 0.97)</b>               | <b>0.89 (0.80 - 0.99)</b>    | 0.48 (0.45 – 0.52)                           |
| <b>Diabetes Status</b>   |                  |                   |                       |                                         |                              |                                              |
| Type 2 , No Insulin      | 3,023 (76.5%)    | 8,024 (76.5%)     | 82,717 (63.7%)        | <b>1.00</b>                             | <b>1.00</b>                  | 1.00                                         |
| Type 2, Insulin          | 738 (18.7%)      | 1,986 (18.9%)     | 28,336 (21.8%)        | <b>0.97 (0.87 – 1.08)</b>               | <b>0.97 (0.86 – 1.11)</b>    | 0.71 (0.66 – 0.77)                           |
| Type 1, Insulin          | 190 (4.8%)       | 478 (4.6%)        | 18,847 (14.5%)        | <b>1.11 (0.91 – 1.34)</b>               | <b>1.50 (1.19 – 1.90)</b>    | 0.28 (0.24 – 0.32)                           |
| <b>Registration Year</b> |                  |                   |                       |                                         |                              |                                              |
| 2001 - 2003              | 1,303 (38.0%)    | 3,422 (37.0%)     | 28,741 (38.8%)        | <b>1.00</b>                             | <b>1.00</b>                  | 1.00                                         |
| 2004 - 2005              | 805 (23.4%)      | 2,239 (24.2%)     | 20,024 (27.0%)        | <b>0.96 (0.85 – 1.07)</b>               | <b>0.97 (0.87 – 1.09)</b>    | 0.89 (0.81 – 0.97)                           |
| 2006 - 2008              | 1,325 (38.6%)    | 3,580 (38.8%)     | 25,389 (34.2%)        | <b>1.01 (0.92 – 1.12)</b>               | <b>1.07 (0.97 – 1.19)</b>    | 1.15 (1.06 – 1.24)                           |
| <b>SEIFA</b>             |                  |                   |                       |                                         |                              |                                              |
| Low                      | 830 (21.0%)      | 2,491 (23.8%)     | 27,049 (21.1%)        | <b>1.00</b>                             | <b>1.00</b>                  | 1.00                                         |
| Middle                   | 1,543 (39.1%)    | 3,883 (37.1%)     | 51,932 (40.5%)        | <b>1.13 (1.01 – 1.27)</b>               | <b>1.11 (0.98 – 1.25)</b>    | 0.97 (0.89 – 1.05)                           |
| High                     | 1,572 (39.9%)    | 4,100 (39.1%)     | 49,214 (38.4%)        | <b>1.11 (0.99 – 1.24)</b>               | <b>1.07 (0.95 – 1.21)</b>    | 1.04 (0.96 – 1.13)                           |
| <b>Indigenous</b>        |                  |                   |                       |                                         |                              |                                              |
| No                       | 3,838 (97.2%)    | 9,969 (95.1%)     | 124,033 (95.5%)       | <b>1.00</b>                             | <b>1.00</b>                  | 1.00                                         |
| Yes                      | 113 (2.8%)       | 519 (4.9%)        | 5,867 (4.5%)          | <b>0.57 (0.45 – 0.71)</b>               | <b>0.61 (0.48 – 0.77)</b>    | 0.62 (0.52 – 0.75)                           |

\*Adjusted for: sex, age category, diabetes status, registration year, SEIFA status, indigenous status

1  
2  
3  
4  
5  
6 show that compared with those with Type 2 diabetes and not insulin dependent,  
7  
8 individuals with Type 2 diabetes and insulin dependent (0.71; 0.66-0.77), and Type 1  
9  
10 diabetes (0.28; 0.24-0.32) were less likely to participate. In addition, the association  
11  
12 between participation status and sex was also strengthened, with females less likely  
13  
14 than males to be participants (0.91; 0.86-0.97). There was no evidence of an association  
15  
16 between participation and SEIFA, but this was not the case with Year of NDSS  
17  
18 registration, as registration between 2006 and 2008 was positively associated with  
19  
20 participation (1.15; 1.06-1.24), whilst registration between 2004 and 2005 was inversely  
21  
22 associated (0.89; 0.81-0.97). Associations between participation, and the covariates of  
23  
24 age and indigenous status were similar in direction and magnitude with those found by  
25  
26 the multivariate analysis, except for those aged at least 70 years, which strengthened  
27  
28 inversely (0.48; 0.45-0.52).  
29  
30  
31  
32  
33  
34  
35  
36  
37  
38

## 39 DISCUSSION

40 The differences observed on the comparisons between participants and non-  
41  
42 participants, and between participants and non-study registrants, confirm that the  
43  
44 extent of a study's generalizability should be established by comparing study  
45  
46 participants to a group of individuals which best represents the target population. In  
47  
48 this study, those who agreed to participate in the LWDS were significantly different  
49  
50 from the non-study registrants over a number of characteristics, with the most notable  
51  
52  
53  
54  
55  
56  
57  
58  
59  
60

1  
2  
3  
4  
5  
6 being diabetes status. Those with Type 2 diabetes who were insulin requiring, were less  
7  
8 likely to participate in the LWDS. Individuals were less likely to be participants if they  
9  
10 were insulin requiring, with the odds of participation being 29% less likely for those with  
11  
12 Type 2 diabetes who were not insulin requiring, and 72% less likely for those with Type  
13  
14 1 diabetes. This parallels the research literature, which suggests that those less healthy  
15  
16 are more likely to be non-responders than those in better health.[22-24] However, this  
17  
18 was not the case when participants were compared to non-participants, which showed  
19  
20 a strong association also, but was directionally opposite to the previous result; the  
21  
22 adjusted odds of those with Type 1 diabetes participating were **50%** greater than those  
23  
24 who had Type 2 diabetes but were not insulin requiring. Such a result indicates that  
25  
26 those with Type 1 diabetes, though less likely to be invited due to consent issues  
27  
28 relating to age of diagnosis,[25] were more likely to participate, once invited.  
29  
30  
31  
32  
33  
34  
35  
36  
37  
38

39 Age and Australian indigenous status were also significantly associated with study  
40  
41 participation, with age also having a negative confounding effect on the LWDS  
42  
43 participation-diabetes status relationship. Unlike the influence of diabetes status, these  
44  
45 associations were similar in direction and strength for both comparative analyses.  
46  
47  
48

49 Though these results are consistent with the literature,[5, 26, 27] they raise the issue of  
50  
51 representativeness. Disparities in sample balance have the potential to impact  
52  
53 adversely on the estimation of population parameters such as prevalence and incidence  
54  
55 metrics.[9, 28-30].  
56  
57  
58  
59  
60

1  
2  
3  
4  
5  
6 Our initial comparative analysis was between participants and non-participants, and  
7  
8  
9  
10  
11  
12  
13  
14  
15  
16  
17  
18  
19  
20  
21  
22  
23  
24  
25  
26  
27  
28  
29  
30  
31  
32  
33  
34  
35  
36  
37  
38  
39  
40  
41  
42  
43  
44  
45  
46  
47  
48  
49  
50  
51  
52  
53  
54  
55  
56  
57  
58  
59  
60

Our initial comparative analysis was between participants and non-participants, and relied solely on information from those invited to participate in the study. This analysis failed to identify an important association between diabetes status and participation.

This was due to the underrepresentation of individuals with Type 1 diabetes by a factor of more than three in the group of invitees (4.6%) when compared to the non-study registrants (14.5%). Such underrepresentation is the consequence of Type 1 diabetes being predominately diagnosed during childhood and the NDSS consent protocol,[20] which does not include a systematic updating of consent status at the age of 18 amongst those registered as a child. Mandatory informed consent, including parental not only has a negative effect on participation rates overall, but also weakens the representativeness of the study sample by producing unbalanced subgroups amongst the study participants.[25, 31, 32] This was the case because research consent was not a necessary criterion for an individual to be considered a registrant. The results of our study should be interpreted within the context of some limitations. Firstly, the generalizability of any study's findings to the target population is very much dependent on register coverage and the quality of its database.[16, 33, 34] Increased levels of coverage and data quality lessen the likelihood of biased sample estimates. [35-37] The coverage of the NDSS is estimated to be between 80% and 90%, which is higher than most diabetes registers,[20, 33] thus giving it the potential to produce sampling frames



1  
2  
3  
4  
5  
6 of a higher data quality than most. Secondly, in analyses such as these which only  
7  
8 utilize one time-point, there is an inability to maximize the information provided by  
9  
10 time varying determinants of non-response such as age.[23, 38, 39] Thirdly, due to  
11  
12 unavailability of individual-level data for non-invitees from the NDSS, it was not possible  
13  
14 to complete a comparative analysis between participants and non-study registrants that  
15  
16 isolated the independent covariate effects after adjustment. It is possible that  
17  
18 individual data would have resulted in the associations between participation and a  
19  
20 number of covariates being more similar to those found when non-participants were  
21  
22 used as the reference group.  
23  
24  
25  
26  
27  
28  
29  
30

31 Our findings illustrate that the standard procedure of comparing study participants and  
32  
33 non-participants in assessing a study's generalizability can be compromised by the issue  
34  
35 of research consent when disease registers are used as a source of recruitment.  
36  
37 Whenever possible, a clearer assessment should be sought by extending this standard  
38  
39 practice to a secondary analysis by sourcing the largest possible reference group that is  
40  
41 inclusive of non-participants. For prospective population-based cohort studies,  
42  
43 researchers should endeavour to source a group that contains all potential participants  
44  
45 who satisfied inclusion criteria, but have not been able to participate. As findings can  
46  
47 be influenced by the issue of research consent; where available, chronic disease  
48  
49 registers should be utilized fully in any assessment of generalizability.  
50  
51  
52  
53  
54  
55  
56  
57  
58  
59  
60

## ACKNOWLEDGMENTS

We would like to especially thank the participants of the Living with Diabetes Study, without their participation this research would not be possible. Also, our sincere thanks go to Diabetes Australia and the National Diabetes Scheme for working with us to make it possible to recruit participants to the Living with Diabetes Study. We are grateful to Queensland Health and the Australian Research Council for funding of this study. In addition, we would also like to thank all members of the Living with Diabetes Study team for their ongoing support and input.

## COMPETING INTERESTS

There are no conflicts of interest with respect to this study as outlined in this paper.

## CONTRIBUTORSHIP STATEMENT

I declare that I conceived the study and was the primary author responsible for this final version. In addition, Dr. Robert Ware assisted and advised on conceptualisation, statistical analysis and reviewing, while Dr. Rosa Alati and Dr. Maria Donald assisted in the review and editing of the final version of this paper.

## FUNDING

We are grateful to both the Australian Research Council and Queensland Health for providing funding that enabled this study to be commenced at the data collection stage and finalized by the completion of this paper.

## REFERENCES

1. Tabák AG, Jokela M, Akbaraly TN, Brunner EJ, Kivimäki M, Witte DR. Trajectories of glycaemia, insulin sensitivity, and insulin secretion before diagnosis of type 2 diabetes: an analysis from the Whitehall II study. *The Lancet*. 2009;373(9682):2215-21.
2. Mrena S, Virtanen SM, Laippala P, Kulmala P, Hannila ML, Akerblom HK, et al. Models for predicting type 1 diabetes in siblings of affected children. *Diabetes care*. 2006;29(3):662-7.
3. Szklo M. Population-based cohort studies. *Epidemiologic reviews*. 1998;20(1):81.
4. Deeg D. Attrition in longitudinal population studies: Does it affect the generalizability of the findings? An introduction to the series. *Journal of clinical epidemiology*. 2002;55(3):213-5.
5. Drivsholm T, Eplov L, Davidsen M, Jørgensen T, Ibsen H, Hollnagel H, et al. Representativeness in population-based studies: a detailed description of non-response in a Danish cohort study. *Scandinavian journal of public health*. 2006;34(6):623-31.
6. Sim J. The external validity of group comparative and single system studies. *Physiotherapy*. 1995;81(5):263-70.
7. Gerrish K, Lacey A, editors. *The Research Process in Nursing*. 6th Edition ed. Chichester: John Wiley and Sons; 2010.

- 1  
2  
3  
4  
5  
6  
7  
8  
9 8. Barry A. How attrition impacts the internal and external validity of longitudinal  
10 research. *Journal of School Health*. 2005;75(7):4.  
11
- 12  
13 9. Livingston PM, Lee SE, McCarty CA, Taylor HR. A comparison of participants with  
14 non-participants in a population-based epidemiologic study: The Melbourne  
15 Visual Impairment Project. *Ophthalmic epidemiology*. 1997;42(2):73-81.  
16  
17
- 18  
19 10. Groves R, Dillman D, Eltinge J, Little R, Biemer P, Lyberg L, et al. Survey  
20 methodology. *Technometrics*. 2005;47(2):246-.  
21  
22
- 23  
24 11. Kalsbeek W, Heiss G. Building bridges between populations and samples in  
25 epidemiological studies. *Annual Review of Public Health*. 2000;21(1):147-69.  
26  
27
- 28  
29 12. Boardman H, Thomas E, Ogden H, Croft P, Millson D. A method to determine if  
30 consenters to population surveys are representative of the target study  
31 population. *Journal of Public Health*. 2005;27(2):212.  
32  
33
- 34  
35 13. Dekkers OM, von Elm E, Algra A, Romijn JA, Vandenbroucke JP. How to assess  
36 the external validity of therapeutic trials: a conceptual approach. *International*  
37  
38  
39  
40  
41  
42  
43  
44  
45  
46  
47  
48  
49  
50  
51  
52  
53  
54  
55  
56  
57  
58  
59  
60  
Journal of Epidemiology. 2010;39(1):89-94.
14. Torner A, Duberg AS, Dickman P, Svensson A. A Proposed Method to Adjust for  
Selection Bias in Cohort Studies. *American Journal of Epidemiology*.  
2010;171(5):602-8.

- 1  
2  
3  
4  
5  
6  
7  
8  
9 15. Jonsson S, Hedblad B, Engstrom G, Nilsson P, Berglund G, Janzon I. Influence of  
10 obesity on cardiovascular risk. Twenty-three-year follow-up of 22 025 men from  
11 an urban Swedish population. *International Journal of Obesity*. 2002;26(8):1046-  
12 53.  
13  
14  
15  
16  
17  
18  
19 16. Brewster D, Stockton D, Harvey J, Mackay M. Reliability of cancer registration  
20 data in Scotland, 1997. *European Journal of Cancer*. 2002;38(3):414-7.  
21  
22  
23  
24 17. Molster C, Bower C, O'Leary P. Community attitudes to the collection and use of  
25 identifiable data for health research—is it an invasion of privacy? *Australian and*  
26 *New Zealand Journal of Public Health*. 2007;31(4):313-7.  
27  
28  
29  
30  
31 18. Gershon A, Tu J. The effect of privacy legislation on observational research.  
32 *Canadian Medical Association Journal*. 2008;178(7):871.  
33  
34  
35  
36 19. Rothman K. The rise and fall of epidemiology, 1950 2000 AD. *New England*  
37 *Journal of Medicine*. 1981;304(10):600-2.  
38  
39  
40  
41 20. Welfare AloHa. Diabetes prevalence in Australia: an assessment of national data  
42 coverage. Diabetes series no14. Canberra: AIHW; 2009.  
43  
44  
45  
46 21. ABS. Census of Population and Housing: Socio-Economic Indexes for Area's  
47 (SEIFA). Canberra: ABS; 2004.  
48  
49  
50  
51 22. Alonso A, Seguí-Gómez M, de Irala J, Sánchez-Villegas A, Beunza J, Martínez-  
52 Gonzalez M. Predictors of follow-up and assessment of selection bias from  
53 dropouts using inverse probability weighting in a cohort of university graduates.  
54 *European journal of epidemiology*. 2006;21(5):351-8.  
55  
56  
57  
58  
59  
60

- 1  
2  
3  
4  
5  
6  
7  
8  
9 23. Coley N, Gardette V, Toulza O, Gillette-Guyonnet S, Cantet C, Nourhashemi F, et  
10 al. Predictive factors of attrition in a cohort of Alzheimer disease patients.  
11 Neuroepidemiology. 2008;31(2):69-79.  
12  
13  
14  
15  
16 24. Holden L, Ware R, Passey M. Characteristics of nonparticipants differed based on  
17 reason for nonparticipation: a study involving the chronically ill. Journal of  
18 clinical epidemiology. 2008;61(7):728-32.  
19  
20  
21  
22  
23 25. Galea S, Tracy M. Participation rates in epidemiologic studies. Annals of  
24 epidemiology. 2007;17(9):643-53.  
25  
26  
27  
28 26. Odierna D, Schmidt L. The Effects of Failing to Include Hard-to-Reach  
29 Respondents in Longitudinal Surveys. American journal of public health.  
30 2009;99(8):1515.  
31  
32  
33  
34  
35 27. Hazell M, Morris J, Linehan M, Frank P, Frank T. Factors influencing the response  
36 to postal questionnaire surveys about respiratory symptoms. Prim Care Respir J.  
37 2009;18(3):165-70.  
38  
39  
40  
41  
42 28. Ware R, Williams G, Aird R. Participants who left a multiple-wave cohort study  
43 had similar baseline characteristics to participants who returned. Annals of  
44 epidemiology. 2006;16(11):820-3.  
45  
46  
47  
48  
49  
50  
51 29. Brilleman S, Pachana N, Dobson A. The impact of attrition on the  
52 representativeness of cohort studies of older people. BMC Medical Research  
53 Methodology. 2010;10(1):71.  
54  
55  
56  
57  
58  
59  
60

- 1  
2  
3  
4  
5  
6  
7  
8  
9 30. Watson N, Wooden M. Identifying factors affecting longitudinal survey response.  
10  
11 In: Lynn P, editor. Methodology of Longitudinal Surveys. New York: Wiley; 2009.  
12  
13 p. 157-81.  
14  
15  
16 31. Rojas NL, Sherrit L, Harris S, Knight JR. The Role of Parental Consent in  
17  
18 Adolescent Substance Use Research. Journal of Adolescent Health.  
19  
20 2008;42(2):192-7.  
21  
22  
23 32. Kho ME, Duffett M, Willison DJ, Cook DJ, Brouwers MC. Written informed  
24  
25 consent and selection bias in observational studies using medical records:  
26  
27 systematic review. British Medical Journal. 2009;338.  
28  
29  
30 33. Joshy G, Simmons D. Diabetes information systems: A rapidly emerging support  
31  
32 for diabetes surveillance and care. Diabetes Technology & Therapeutics.  
33  
34 2006;8(5):587-97.  
35  
36  
37 34. Nickelsen T. Data validity and coverage in the Danish National Health Registry. A  
38  
39 literature review. Ugeskrift for laeger. 2001;164(1):33.  
40  
41  
42 35. Choi B, Pak A. Understanding and minimizing epidemiologic bias in public health  
43  
44 research. Revue Canadienne De Sante Publique. 2005;96(4).  
45  
46  
47 36. Biemer P, Lyberg L, Wiley J. Introduction to survey quality. ed. Hoboken, NJ:  
48  
49 Wiley Online Library; 2003.  
50  
51  
52  
53  
54  
55  
56  
57  
58  
59  
60

- 1  
2  
3  
4  
5  
6  
7 37. Blumberg S, Luke J. Coverage bias in traditional telephone surveys of low-income  
8 and young adults. *Public Opinion Quarterly*. 2007;71(5):734.  
9  
10  
11  
12 38. Siddiqui O, Flay B, Hu F. Factors affecting attrition in a longitudinal smoking  
13 prevention study. *Preventive Medicine*. 1996;25(5):554-60.  
14  
15  
16  
17 39. Che YH, Assanangkornchai S, McNeil E, Chongsuvivatwong V, Li JH, Geater A, et  
18 al. Predictors of early dropout in methadone maintenance treatment program in  
19 Yunnan province, China. *Drug and Alcohol Review*. 2010;29(3):263-70.  
20  
21  
22  
23  
24  
25  
26  
27  
28  
29  
30  
31  
32  
33  
34  
35  
36  
37  
38  
39  
40  
41  
42  
43  
44  
45  
46  
47  
48  
49  
50  
51  
52  
53  
54  
55  
56  
57  
58  
59  
60



1  
2  
3  
4  
5  
6  
7  
8  
9  
10  
11  
12  
13  
14  
15  
16  
17  
18  
19  
20  
21  
22  
23  
24  
25  
26  
27  
28  
29  
30  
31  
32  
33  
34  
35  
36  
37  
38  
39  
40  
41  
42  
43  
44  
45  
46  
47  
48  
49  
50  
51  
52  
53  
54  
55  
56  
57  
58  
59  
60

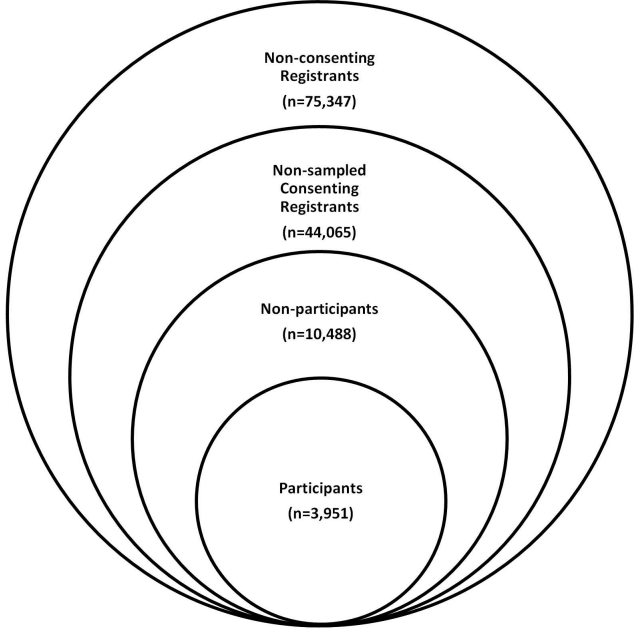

Schematic diagram of the four mutually exclusive subgroups that constitute registrants with the National Diabetes Scheme.  
190x254mm (300 x 300 DPI)



Participation flowchart for the Living with Diabetes Study  
174x241mm (200 x 200 DPI)

1 STROBE Statement—Checklist of items that should be included in reports of *cohort studies*

|                              | No | Recommendation                                                                                                                                                                                            |
|------------------------------|----|-----------------------------------------------------------------------------------------------------------------------------------------------------------------------------------------------------------|
| <b>Title and abstract</b>    | 1  | (a) Indicate the study's design with a commonly used term in the title or the abstract<br>(See pages 1, 2 & 3 of manuscript)                                                                              |
|                              |    | (b) Provide in the abstract an informative and balanced summary of what was done and what was found<br>(See pages 2 & 3 of manuscript)                                                                    |
| <b>Introduction</b>          |    |                                                                                                                                                                                                           |
| Background/rationale         | 2  | Explain the scientific background and rationale for the investigation being reported<br>(See paragraph 1)                                                                                                 |
| Objectives                   | 3  | State specific objectives, including any prespecified hypotheses<br>(See paragraph 2)                                                                                                                     |
| <b>Methods</b>               |    |                                                                                                                                                                                                           |
| Study design                 | 4  | Present key elements of study design early in the paper<br>(See paragraph 2)                                                                                                                              |
| Setting                      | 5  | Describe the setting, locations, and relevant dates, including periods of recruitment, exposure, follow-up, and data collection<br>(See paragraph 1)                                                      |
| Participants                 | 6  | (a) Give the eligibility criteria, and the sources and methods of selection of participants. Describe methods of follow-up<br>(See paragraph 1 & data only collected from baseline survey)                |
|                              |    | (b) For matched studies, give matching criteria and number of exposed and unexposed<br>(Not applicable)                                                                                                   |
| Variables                    | 7  | Clearly define all outcomes, exposures, predictors, potential confounders, and effect modifiers. Give diagnostic criteria, if applicable<br>(See paragraph 2)                                             |
| Data sources/<br>measurement | 8* | For each variable of interest, give sources of data and details of methods of assessment (measurement). Describe comparability of assessment methods if there is more than one group<br>(See paragraph 1) |
| Bias                         | 9  | Describe any efforts to address potential sources of bias<br>(See paragraph 1 i.e. randomly sampled from disease register)                                                                                |
| Study size                   | 10 | Explain how the study size was arrived at<br>(Not reported in this study as outcomes associated with diabetes not an objective of this paper)                                                             |
| Quantitative variables       | 11 | Explain how quantitative variables were handled in the analyses. If applicable, describe which groupings were chosen and why<br>(See paragraph 3)                                                         |
| Statistical methods          | 12 | (a) Describe all statistical methods, including those used to control for confounding<br>(Multivariate logistic analysis was used to control for potential confounders i.e. see paragraph 3)              |
|                              |    | (b) Describe any methods used to examine subgroups and interactions<br>(See paragraph 3)                                                                                                                  |
|                              |    | (c) Explain how missing data were addressed<br>(Due to study's objectives, there was no need to incorporate or utilize any statistical adjustment for missing data).                                      |
|                              |    | (d) If applicable, explain how loss to follow-up was addressed<br>(See paragraph 2, for strategies to maximize participation at baseline)                                                                 |

|                          |     |                                                                                                                                                                                                                                                                                                                                                                                                                                                                                                                |
|--------------------------|-----|----------------------------------------------------------------------------------------------------------------------------------------------------------------------------------------------------------------------------------------------------------------------------------------------------------------------------------------------------------------------------------------------------------------------------------------------------------------------------------------------------------------|
|                          |     | (e) Describe any sensitivity analyses<br>(See paragraph 2 in Results section)                                                                                                                                                                                                                                                                                                                                                                                                                                  |
| <b>Results</b>           |     |                                                                                                                                                                                                                                                                                                                                                                                                                                                                                                                |
| Participants             | 13* | (a) Report numbers of individuals at each stage of study—eg numbers potentially eligible, examined for eligibility, confirmed eligible, included in the study, completing follow-up, and analysed<br>(See Figure 1)<br>(b) Give reasons for non-participation at each stage<br>(See paragraphs 2&3 for associations between baseline characteristics and participation status)<br>(c) Consider use of a flow diagram<br>(See Figure 1)                                                                         |
| Descriptive data         | 14* | (a) Give characteristics of study participants (eg demographic, clinical, social) and information on exposures and potential confounders<br>(See Table 1)<br>(b) Indicate number of participants with missing data for each variable of interest<br>(See Table 1)<br>(c) Summarise follow-up time (eg, average and total amount)<br>(Not applicable as only participation at baseline/wave 1 considered)                                                                                                       |
| Outcome data             | 15* | Report numbers of outcome events or summary measures over time<br>(See Table 1)                                                                                                                                                                                                                                                                                                                                                                                                                                |
| Main results             | 16  | (a) Give unadjusted estimates and, if applicable, confounder-adjusted estimates and their precision (eg, 95% confidence interval). Make clear which confounders were adjusted for and why they were included<br>(See Table 1 and paragraph 2)<br>(b) Report category boundaries when continuous variables were categorized<br>(See paragraph 3 in Methods and Table 1)<br>(c) If relevant, consider translating estimates of relative risk into absolute risk for a meaningful time period<br>(Not applicable) |
| Other analyses           | 17  | Report other analyses done—eg analyses of subgroups and interactions, and sensitivity analyses<br>(See paragraph 2)                                                                                                                                                                                                                                                                                                                                                                                            |
| <b>Discussion</b>        |     |                                                                                                                                                                                                                                                                                                                                                                                                                                                                                                                |
| Key results              | 18  | Summarise key results with reference to study objectives<br>(See paragraph 1, 2 & 3)                                                                                                                                                                                                                                                                                                                                                                                                                           |
| Limitations              | 19  | Discuss limitations of the study, taking into account sources of potential bias or imprecision. Discuss both direction and magnitude of any potential bias<br>(See paragraph 4)                                                                                                                                                                                                                                                                                                                                |
| Interpretation           | 20  | Give a cautious overall interpretation of results considering objectives, limitations, multiplicity of analyses, results from similar studies, and other relevant evidence<br>(See paragraphs 2,3 & 4)                                                                                                                                                                                                                                                                                                         |
| Generalisability         | 21  | Discuss the generalisability (external validity) of the study results<br>(See paragraph 4)                                                                                                                                                                                                                                                                                                                                                                                                                     |
| <b>Other information</b> |     |                                                                                                                                                                                                                                                                                                                                                                                                                                                                                                                |
|                          | 22  | Give the source of funding and the role of the funders for the present study and, if                                                                                                                                                                                                                                                                                                                                                                                                                           |

1  
2  
3  
4  
5  
6  
7  
8  
9  
10  
11  
12  
13  
14  
15  
16  
17  
18  
19  
20  
21  
22  
23  
24  
25  
26  
27  
28  
29  
30  
31  
32  
33  
34  
35  
36  
37  
38  
39  
40  
41  
42  
43  
44  
45  
46  
47  
48  
49  
50  
51  
52  
53  
54  
55  
56  
57  
58  
59  
60

---

|         |                                                                                                                   |
|---------|-------------------------------------------------------------------------------------------------------------------|
| Funding | applicable, for the original study on which the present article is based<br>(See funding statement in manuscript) |
|---------|-------------------------------------------------------------------------------------------------------------------|

---

\*Give information separately for exposed and unexposed groups.

**Note:** An Explanation and Elaboration article discusses each checklist item and gives methodological background and published examples of transparent reporting. The STROBE checklist is best used in conjunction with this article (freely available on the Web sites of PLoS Medicine at <http://www.plosmedicine.org/>, Annals of Internal Medicine at <http://www.annals.org/>, and Epidemiology at <http://www.epidem.com/>). Information on the STROBE Initiative is available at <http://www.strobe-statement.org>.

For peer review only

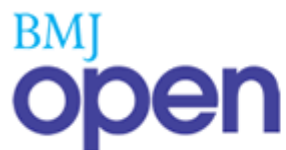

**Assessing generalisability through the use of disease registers: findings from a diabetes cohort study**

|                                 |                                                                                                                                                                                                                                                                                                            |
|---------------------------------|------------------------------------------------------------------------------------------------------------------------------------------------------------------------------------------------------------------------------------------------------------------------------------------------------------|
| Journal:                        | <i>BMJ Open</i>                                                                                                                                                                                                                                                                                            |
| Manuscript ID:                  | bmjopen-2011-000078.R2                                                                                                                                                                                                                                                                                     |
| Article Type:                   | Research                                                                                                                                                                                                                                                                                                   |
| Date Submitted by the Author:   | 24-Jun-2011                                                                                                                                                                                                                                                                                                |
| Complete List of Authors:       | David, Michael; The University of Queensland, School of Population Health<br>Ware, Robert; The University of Queensland, School of Population Health<br>Donald, Maria; The University of Queensland, School of Population Health<br>Alati, Rosa; The University of Queensland, School of Population Health |
| <b>Primary Subject Heading</b>: | Statistics & research methods                                                                                                                                                                                                                                                                              |
| Keywords:                       | EPIDEMIOLOGY, PUBLIC HEALTH, STATISTICS & RESEARCH METHODS, GENERAL DIABETES < DIABETES & ENDOCRINOLOGY                                                                                                                                                                                                    |
|                                 |                                                                                                                                                                                                                                                                                                            |

SCHOLARONE™  
Manuscripts

# TITLE PAGE

**TITLE:**

Assessing generalisability through the use of disease registers: findings from a diabetes cohort study

**CORRESPONDING AUTHOR:**

Name: Michael David  
Postal Address: School of Population Health, The University of Queensland,  
Herston, Queensland 4000, Australia  
E-mail: [michael.david@uqconnect.edu.au](mailto:michael.david@uqconnect.edu.au)  
Tel: +61 733655298  
Fax: +61 733655298

**CO-AUTHORS:**

Robert Ware<sup>1</sup>; Maria Donald<sup>1</sup>; and Rosa Alati<sup>1</sup>

<sup>1</sup> School of Population Health, The University of Queensland, Herston, Queensland, Australia

**KEY WORDS and PHRASES:**

Generalisability; Cohort Study; Research Consent; Disease Register

**WORD COUNT:**

2,170

# ABSTRACT

## Objectives

The knowledge of a study population's similarity to the target population allows researchers to assess the generalisability of their results. Often generalisability is assessed through a comparison of baseline characteristics between individuals who did, and did not respond to an invitation to participate in a study. In this prospective population-based cohort, we broadened this assessment by comparing participants with all individuals from a chronic disease register who satisfied the study eligibility criteria but for a number of reasons, such as the absence of consent to be approached for research purposes, did not participate.

## Methods

Data are from The Living with Diabetes Study, a population-based cohort of individuals diagnosed with diabetes mellitus, which commenced in Queensland, Australia in 2008. Individuals were sampled from a federally-funded diabetes register. We compared the characteristics of 3,951 study participants with 10,488 non-participants (individuals who were invited to participate but declined), and with 129,900 non-study registrants (individuals on the register who did not participate in the study).

## Results

Study participants were more likely than non-study registrants to be male, aged 50 to 69, have Type 2 diabetes not requiring insulin, be recently registered and be non-indigenous Australians. Study participants were more likely than non-participants to be aged 50 to 69, have Type 1 diabetes, and be non-indigenous Australians.



## Conclusions

The interpretation of a study's generalisability can alter depending on which non-participating group is compared with participants. When assessing generalisability, participants should be compared with the largest possible group of non-participating individuals. When sampling from a disease register, researchers should be wary of the influence of research consent procedures on the register's coverage.

For peer review only

# Article Summary

## Article Focus

- \* to assess the similarity between participants recruited into a study who were sampled from a chronic disease register, with registrants who did not participate in the study
- \* to assess whether the differences between participants and registrants who did not participate are similar to the differences between participants and individuals who were invited to participate but declined

## Key Messages

- \* the generalisability of a study should be assessed by comparing participants with the largest possible group of non-participating individuals
- \* when sampling from a disease register, researchers should be wary of the influence of research consent procedures on the register's coverage

## Strengths and Limitations

- \* information is available for all individuals registered with the chronic disease register
- \* the chronic disease register from which study participants were recruited from has high coverage of target population
- \* only aggregated data was available for registrants who were not invited to participate in the study

## INTRODUCTION

Population-based cohort studies are essential when studying chronic diseases such as diabetes mellitus, as they can offer a comprehensive understanding of disease trajectory over time and allow for multiple subgroup analyses.(1, 2) However the utility of each study's findings depends on whether the results are sufficiently generalisable to the population under investigation. The extent of a study's generalisability, or external validity, depends on how representative of the target population the study's participants are.(3-5) Since information on the target population is often unavailable, investigations concerning the generalisability of population-based cohorts, including those concerning diabetes, have focused on the comparison of baseline characteristics between study participants and non-participants to assess how similar or different they are.(6-9) However, a high degree of similarity between participants and non-participants does not necessarily mean results arising from the study will have good generalisability, as these two groups as a whole might not fully represent the target population due to coverage error.(10, 11) The extent to which findings are generalisable can be assessed by comparing the study participants with the largest possible subset of all diseased individuals in the population being studied, other than participants.(12, 13) The characteristics of this larger group can be accessed through databases such as national chronic disease registers.(6)

1  
2  
3  
4  
5  
6  
7 Chronic disease registries are increasingly used to recruit participants to cohort studies. One  
8  
9 purported advantage of this is to ensure generalisability to the target population.(14-16) In  
10  
11 recent years however, legislative reform concerning privacy issues has been introduced in  
12  
13 many countries, including Australia, which has restricted research related access to these  
14  
15 databases without an individual's consent.(17) It is possible that this may seriously limit the  
16  
17 usefulness of chronic disease registers for epidemiologic research.(18, 19) This study  
18  
19 investigates the generalisability of one Australian register, the National Diabetes Services  
20  
21 Scheme (NDSS) and explores whether chronic disease registrants who agreed to participate  
22  
23 in a research study have similar characteristics to registrants who satisfied the inclusion  
24  
25 criteria but did not participate. We also compare the characteristics of participants with the  
26  
27 characteristics of individuals who were invited to participate, but declined.  
28  
29  
30  
31  
32  
33  
34  
35  
36

## 37 **METHODS**

38  
39 The Living with Diabetes Study (LWDS) is a population-based cohort study that began in  
40  
41 Queensland, Australia in 2008. An individual was eligible to participate in the study if they  
42  
43 had doctor diagnosed Type 1 or 2 diabetes; were aged at least 18 years and had a valid  
44  
45 Queensland postal address. Individuals were randomly sampled from a federally-funded  
46  
47 register of Australians with diabetes, the NDSS, managed by a non-governmental  
48  
49 organisation named Diabetes Australia. The NDSS's coverage of Queenslanders with  
50  
51 diabetes is estimated to be between 80% and 90%. (20) Since 2001, individuals joining the  
52  
53  
54  
55  
56  
57  
58  
59  
60

1  
2  
3  
4  
5  
6 NDSS have been asked whether they would like to be informed about opportunities to  
7  
8 participate in research. Only those who consented to be contacted for research purposes  
9  
10 were eligible to be invited to participate in the LWDS. The LWDS sampling design specified  
11  
12 three target locations of policy interest to be oversampled: an outer metropolitan area; a  
13  
14 new suburban development and a coastal agricultural community. All eligible individuals  
15  
16 from the three locations were invited to participate; approximately one in six eligible  
17  
18 individuals from the rest of Queensland were invited to participate.  
19  
20  
21  
22  
23  
24  
25

26 Selected individuals were invited to participate in the LWDS via a mailed questionnaire.  
27  
28 Information was collected on demographic and socio-economic characteristics, health  
29  
30 behaviour, and health and psychological status. Strategies to maximise participation  
31  
32 included reminder cards, telephone calls and replacement surveys. We categorised  
33  
34 registrants into four mutually exclusive groups: participants, non-participants, non-sampled  
35  
36 consenting registrants and non-consenting registrants. A participant was defined as an  
37  
38 individual who agreed to participate in the LWDS. A non-participant was defined as an  
39  
40 individual who was invited to participate in the LWDS but declined. A non-sampled  
41  
42 consenting registrant was defined as an individual who agreed to participate in the LWDS  
43  
44 but was not selected during the sampling process. A non-consenting registrant was defined  
45  
46 as an individual who had not agreed to be contacted for research purposes. Initially,  
47  
48 participants were compared to non-participants (the reference group). For a secondary  
49  
50  
51  
52  
53  
54  
55  
56  
57  
58  
59  
60

1  
2  
3  
4  
5  
6 comparative analysis, the reference group was expanded to comprise all registrants who  
7  
8 were not study participants. This expanded reference group was defined as non-study  
9  
10 registrants (Figure 1). Available individual-level information on participants and non-  
11  
12 participants consisted of sex, age, diabetes status, year of NDSS registration, postcode and  
13  
14 indigenous status. Postcodes were matched to the Australian Bureau of Statistics' Index of  
15  
16 Relative Socio-economic Disadvantage (SEIFA) ranking, and categorised into tertiles.(21)  
17  
18 Due to privacy and research consent issues, only covariate aggregate data was available for  
19  
20 individuals not invited to participate in the study. Ethics approval was obtained from the  
21  
22 University of Queensland's Behavioural and Social Sciences Ethical Review Committee.  
23  
24  
25  
26  
27  
28  
29  
30

31 [Figure 1 to be inserted here]  
32  
33  
34

### 35 **Data Analysis**

36 For participants, non-participants and non-study registrants we calculated the frequency  
37  
38 (percentage) of individuals in each category for sex, age (18-49, 50-69 and 70+ years),  
39  
40 diabetes status (Type 2 non-insulin requiring; Type 2 insulin requiring, Type 1), registration  
41  
42 year (2001-2003, 2004-2005, 2006-2008), SEIFA tertile and indigenous status. Initially, we  
43  
44 used logistic regression analyses to compare participants with non-participants on a  
45  
46 univariable basis. We then fitted a series of multivariate logistic regression models in order  
47  
48  
49  
50  
51  
52  
53  
54  
55  
56  
57  
58  
59  
60

1  
2  
3  
4  
5  
6 to investigate the impact of potential confounders and obtain fully-adjusted associations.  
7  
8  
9 Analyses were weighted according to the sampling scheme. As individual-level data was not  
10  
11 available for all individuals in the reference group of non-study registrants, we used  
12  
13 univariable logistic regression with aggregate data to compare participants with non-study  
14  
15 registrants. Results for each of the analyses are presented in Table 1 as odds ratios (ORs)  
16  
17 and 95% confidence intervals (95% CIs).  
18  
19  
20  
21  
22

## 23 RESULTS

24  
25 At the 30<sup>th</sup> of June 2008 there were 133,851 registrants in the NDSS who satisfied the LWDS  
26  
27 entry criteria, of whom 75,347 (56.3%) did not consent to participate in any research and  
28  
29 were excluded (Figure 2). Of the remaining 58,504 registrants, 14,439 were invited to  
30  
31 participate in the LWDS; 3,951 of whom agreed. Complete aggregate information was  
32  
33 available for all variables except for registration year and SEIFA. Due to NDSS procedural  
34  
35 changes and invalid postcodes, data for 56,264 registration years and 1,711 postcodes were  
36  
37 not available for the analyses.  
38  
39  
40  
41  
42  
43  
44  
45

46 [Figure 2 to be inserted here]  
47  
48  
49  
50  
51  
52  
53  
54  
55  
56  
57  
58  
59  
60

1  
2  
3  
4  
5  
6 Table 1 displays a comparison of 3,951 participants and 10,488 non-participants, and a  
7  
8 comparison between participants and 129,900 non-study registrants. After adjusting for all  
9  
10 covariates, individuals were less likely to participate in the LWDS if they were younger  
11  
12 (OR=0.63; 95% CI: 0.55-0.71) or older (0.89; 0.81-0.99) than those aged 50 to 69 years; and  
13  
14 had identified themselves as being indigenous Australians (0.61; 0.48-0.77). Those who had  
15  
16 Type 1 diabetes (1.50; 1.19-1.90) were more likely to participate in the study. A sensitivity  
17  
18 analysis was conducted to specifically investigate the effect of potential confounders. The  
19  
20 analyses were re-run six times with one covariate excluded on each occasion. The only  
21  
22 effect estimate seen to vary substantially was diabetes status. In the model adjusted across  
23  
24 all covariates except age (not shown in Table 1), the odds of being a participant if an  
25  
26 individual had Type 1 diabetes was 1.13 (0.91 –1.42) greater than if an individual had Type 2  
27  
28 diabetes and was not insulin requiring, while for the fully adjusted model it was 1.50 (1.19–  
29  
30 1.90).

31  
32  
33  
34  
35  
36  
37  
38  
39  
40  
41 The comparative analyses between participants and non-study registrants (Table 1) shows a  
42  
43 number of associational differences when compared to the previous multivariate analysis.  
44  
45 The most noticeable is the relationship between participation and diabetes status, as it  
46  
47 varies not only in strength, but direction. These analyses show that compared to those with  
48  
49 Type 2 diabetes who were not insulin reliant, individuals with Type 2 diabetes and insulin  
50  
51 reliance (0.71; 0.66-0.77), and Type 1 diabetes (0.28; 0.24-0.32) were less likely to  
52  
53  
54  
55  
56  
57  
58  
59  
60



**Table 1: Comparison between Living with Diabetes Participants, Non-participants and Non-study registrants.**

|                          | Participants     | Non-participants  | Non-study Registrants | Participants Vs Non-participants |                       | Participants Vs Non-study Registrants |
|--------------------------|------------------|-------------------|-----------------------|----------------------------------|-----------------------|---------------------------------------|
|                          |                  |                   |                       | Crude OR (95% CI)                | Adjusted OR (95% CI)* | Crude OR (95% CI)                     |
|                          | <b>N = 3,951</b> | <b>N = 10,488</b> | <b>N = 129,900</b>    |                                  |                       |                                       |
| <b>Sex</b>               |                  |                   |                       |                                  |                       |                                       |
| Male                     | 2,176 (55.1%)    | 5,885 (56.1%)     | 68,618 (52.8%)        | 1.00                             | 1.00                  | 1.00                                  |
| Female                   | 1,775 (44.9%)    | 4,603 (43.9%)     | 61,282 (47.2%)        | 1.01 (0.93 – 1.10)               | 1.07 (0.98 – 1.17)    | 0.91 (0.86 – 0.97)                    |
| <b>Age</b>               |                  |                   |                       |                                  |                       |                                       |
| 18-49                    | 618 (15.6%)      | 2,246 (21.4%)     | 21,387 (16.5%)        | 0.67 (0.60 - 0.75)               | 0.63 (0.55 – 0.71)    | 0.71 (0.66 – 0.79)                    |
| 50 - 69                  | 2,375 (60.1%)    | 5,649 (53.9%)     | 58,988 (45.4%)        | 1.00                             | 1.00                  | 1.00                                  |
| 70+                      | 958 (24.3%)      | 2,593 (24.7%)     | 49,525 (38.1%)        | 0.88 (0.80 – 0.97)               | 0.89 (0.80 - 0.99)    | 0.48 (0.45 – 0.52)                    |
| <b>Diabetes Status</b>   |                  |                   |                       |                                  |                       |                                       |
| Type 2 , No Insulin      | 3,023 (76.5%)    | 8,024 (76.5%)     | 82,717 (63.7%)        | 1.00                             | 1.00                  | 1.00                                  |
| Type 2, Insulin          | 738 (18.7%)      | 1,986 (18.9%)     | 28,336 (21.8%)        | 0.97 (0.87 – 1.08)               | 0.97 (0.86 – 1.11)    | 0.71 (0.66 – 0.77)                    |
| Type 1, Insulin          | 190 (4.8%)       | 478 (4.6%)        | 18,847 (14.5%)        | 1.11 (0.91 – 1.34)               | 1.50 (1.19 – 1.90)    | 0.28 (0.24 – 0.32)                    |
| <b>Registration Year</b> |                  |                   |                       |                                  |                       |                                       |
| 2001 - 2003              | 1,303 (38.0%)    | 3,422 (37.0%)     | 28,741 (38.8%)        | 1.00                             | 1.00                  | 1.00                                  |
| 2004 - 2005              | 805 (23.4%)      | 2,239 (24.2%)     | 20,024 (27.0%)        | 0.96 (0.85 – 1.07)               | 0.97 (0.87 – 1.09)    | 0.89 (0.81 – 0.97)                    |
| 2006 - 2008              | 1,325 (38.6%)    | 3,580 (38.8%)     | 25,389 (34.2%)        | 1.01 (0.92 – 1.12)               | 1.07 (0.97 – 1.19)    | 1.15 (1.06 – 1.24)                    |
| <b>SEIFA</b>             |                  |                   |                       |                                  |                       |                                       |
| Low                      | 830 (21.0%)      | 2,491 (23.8%)     | 27,049 (21.1%)        | 1.00                             | 1.00                  | 1.00                                  |
| Middle                   | 1,543 (39.1%)    | 3,883 (37.1%)     | 51,932 (40.5%)        | 1.13 (1.01 – 1.27)               | 1.11 (0.98 – 1.25)    | 0.97 (0.89 – 1.05)                    |
| High                     | 1,572 (39.9%)    | 4,100 (39.1%)     | 49,214 (38.4%)        | 1.11 (0.99 – 1.24)               | 1.07 (0.95 – 1.21)    | 1.04 (0.96 – 1.13)                    |
| <b>Indigenous</b>        |                  |                   |                       |                                  |                       |                                       |
| No                       | 3,838 (97.2%)    | 9,969 (95.1%)     | 124,033 (95.5%)       | 1.00                             | 1.00                  | 1.00                                  |
| Yes                      | 113 (2.8%)       | 519 (4.9%)        | 5,867 (4.5%)          | 0.57 (0.45 – 0.71)               | 0.61 (0.48 – 0.77)    | 0.62 (0.52 – 0.75)                    |

\*Adjusted for: sex, age category, diabetes status, registration year, SEIFA status, indigenous status

1  
2  
3  
4  
5  
6 participate. In addition, the association between participation status and sex was also  
7  
8 strengthened, with females less likely than males to be participants (0.91; 0.86-0.97).  
9  
10 There was no evidence of an association between participation and SEIFA, but this was  
11  
12 not the case with Year of NDSS registration, as registration between 2006 and 2008 was  
13  
14 positively associated with participation (1.15; 1.06-1.24), whilst registration between  
15  
16 2004 and 2005 was inversely associated (0.89; 0.81-0.97). Associations between  
17  
18 participation, and the covariates of age and indigenous status were similar in direction  
19  
20 and magnitude with those found by the multivariate analysis, except for those aged at  
21  
22 least 70 years, which strengthened inversely (0.48; 0.45-0.52).  
23  
24  
25  
26  
27  
28  
29  
30

## 31 DISCUSSION

32  
33 The differences observed on the comparisons between participants and non-  
34  
35 participants, and between participants and non-study registrants, confirm that the  
36  
37 extent of a study's generalisability should be established by comparing study  
38  
39 participants to a group of individuals which best represents the target population. In  
40  
41 this study, those who agreed to participate in the LWDS were significantly different  
42  
43 from the non-study registrants over a number of characteristics, with the most notable  
44  
45 being diabetes status. Those with Type 2 diabetes who were insulin requiring, were less  
46  
47 likely to participate in the LWDS. Individuals were less likely to be participants if they  
48  
49 were insulin requiring, with the odds of participation being 29% less likely for those with  
50  
51  
52  
53  
54  
55  
56  
57  
58  
59  
60

1  
2  
3  
4  
5  
6 Type 2 diabetes who were insulin requiring, and 72% less likely for those with Type 1  
7  
8 diabetes. This parallels the research literature, which suggests that those less healthy  
9  
10 are more likely to be non-responders than those in better health.(22-24) However, this  
11  
12 was not the case when participants were compared to non-participants, which showed  
13  
14 a strong association also, but was directionally opposite to the previous result; the  
15  
16 adjusted odds of those with Type 1 diabetes participating were 50% greater than those  
17  
18 who had Type 2 diabetes but were not insulin requiring. Such a result indicates that  
19  
20 those with Type 1 diabetes, though less likely to be invited due to consent issues  
21  
22 relating to age of diagnosis,(25) were more likely to participate, once invited.  
23  
24  
25  
26  
27  
28  
29  
30

31 Age and Australian indigenous status were also significantly associated with study  
32  
33 participation, with age also having a negative confounding effect on the LWDS  
34  
35 participation-diabetes status relationship. Unlike the influence of diabetes status, these  
36  
37 associations were similar in direction and strength for both comparative analyses.  
38  
39

40  
41 Though these results are consistent with the literature,(5, 26, 27) they raise the issue of  
42  
43 representativeness. Disparities in sample balance have the potential to impact  
44  
45 adversely on the estimation of population parameters such as prevalence and incidence  
46  
47 metrics.(9, 28-30).  
48  
49  
50  
51  
52  
53

54 Our initial comparative analysis was between participants and non-participants, and  
55  
56 relied solely on information from those invited to participate in the study. This analysis  
57  
58 failed to identify an important association between diabetes status and participation.  
59  
60

1  
2  
3  
4  
5  
6 This was due to the underrepresentation of individuals with Type 1 diabetes by a factor  
7  
8 of more than three in the group of non-participants (4.6%) when compared to  
9  
10 registrants not invited to participate in the study (15.4%). Such underrepresentation is  
11  
12 the consequence of Type 1 diabetes being predominately diagnosed during childhood  
13  
14 and the NDSS consent protocol,(20) which does not include a systematic updating of  
15  
16 consent status at the age of 18 amongst those registered as a child. Mandatory  
17  
18 informed consent, including parental not only has a negative effect on participation  
19  
20 rates overall, but also weakens the representativeness of the study sample by producing  
21  
22 unbalanced subgroups amongst the study participants.(25, 31, 32) This was the case  
23  
24 because research consent was not a necessary criterion for an individual to be  
25  
26 considered a registrant.  
27  
28  
29  
30  
31  
32  
33  
34  
35

36 The results of our study should be interpreted within the context of some limitations.  
37  
38 Firstly, the generalisability of any study's findings to the target population is very much  
39  
40 dependent on register coverage and the quality of its database.(16, 33, 34) Increased  
41  
42 levels of coverage and data quality lessen the likelihood of biased sample estimates.  
43  
44 (35-37) The coverage of the NDSS is estimated to be between 80% and 90%, which is  
45  
46 higher than most diabetes registers,(20, 33) thus giving it the potential to produce  
47  
48 sampling frames of a higher data quality than most. Secondly, in analyses such as these  
49  
50 which only utilise one time-point, there is an inability to maximise the information  
51  
52 provided by time varying determinants of non-response such as age.(23, 38, 39) Thirdly,  
53  
54  
55  
56  
57  
58  
59  
60

1  
2  
3  
4  
5  
6 due to unavailability of individual-level data for registrants not invited to participate in  
7  
8 the study, it was not possible to complete a comparative analysis between participants  
9  
10 and non-study registrants that isolated the independent covariate effects after  
11  
12 adjustment. It is possible that individual data would have resulted in the associations  
13  
14 between participation and a number of covariates being more similar to those found  
15  
16 when non-participants were used as the reference group.  
17  
18  
19  
20  
21  
22

23  
24 Our findings illustrate that the standard procedure of comparing study participants and  
25  
26 non-participants in assessing a study's generalisability can be compromised by the issue  
27  
28 of research consent when disease registers are used as a source of recruitment.  
29  
30 Whenever possible, a clearer assessment should be sought by extending this standard  
31  
32 practice to a secondary analysis by sourcing the largest possible reference group that is  
33  
34 inclusive of non-participants. For prospective population-based cohort studies,  
35  
36 researchers should endeavour to source a group that contains all potential participants  
37  
38 who satisfied inclusion criteria, but have not been able to participate. As findings can  
39  
40 be influenced by the issue of research consent; where available, chronic disease  
41  
42 registers should be utilised fully in any assessment of generalisability.  
43  
44  
45  
46  
47  
48  
49  
50  
51  
52  
53  
54  
55  
56  
57  
58  
59  
60

## ACKNOWLEDGMENTS

We would like to especially thank the participants of the Living with Diabetes Study; without their participation this research would not be possible. Also, our sincere thanks go to Diabetes Australia and the National Diabetes Services Scheme for working with us to make it possible to recruit participants to the Living with Diabetes Study. We are also grateful to Queensland Health and the Australian Research Council for the funding of this study. In addition, we would also like to thank all members of the Living with Diabetes Study team for their ongoing support and input.

## COMPETING INTERESTS

There are no conflicts of interest with respect to this study as outlined in this paper.

## CONTRIBUTORSHIP STATEMENT

**All authors designed the study. M. Donald was responsible for the data acquisition. M. David and R. Ware analysed the data. M. David drafted the initial manuscript. R. Ware, M. Donald and R. Alati critically reviewed the manuscript. All authors read and approved the final manuscript.**

## FUNDING

This research was funded by Australian Research Council (DP0988805) and Queensland Health through the Queensland Strategy for Chronic Disease 2005 – 20015.

## REFERENCES

1. Tabák AG, Jokela M, Akbaraly TN, Brunner EJ, Kivimäki M, Witte DR. Trajectories of glycaemia, insulin sensitivity, and insulin secretion before diagnosis of type 2 diabetes: an analysis from the Whitehall II study. *The Lancet*. 2009;373(9682):2215-21.
2. Mrena S, Virtanen SM, Laippala P, Kulmala P, Hannila ML, Akerblom HK, et al. Models for predicting type 1 diabetes in siblings of affected children. *Diabetes Care*. 2006;29(3):662-7.
3. Szklo M. Population-based cohort studies. *Epidemiol Rev*. 1998;20(1):81-90.
4. Deeg DJH. Attrition in longitudinal population studies: Does it affect the generalizability of the findings? An introduction to the series. *J Clin Epidemiol*. 2002;55(3):213-5.
5. Drivsholm T, Eplöv LF, Davidsen M, Jørgensen T, Ibsen H, Hollnagel H, et al. Representativeness in population-based studies: a detailed description of non-response in a Danish cohort study. *Scand J Public Health*. 2006;34(6):623-31.
6. Sim J. The external validity of group comparative and single system studies. *Physiotherapy*. 1995;81(5):263-70.
7. Gerrish K, Lacey A, editors. *The Research Process in Nursing*. 6th Edition ed. Chichester: John Wiley and Sons; 2010.
8. Barry AE. How attrition impacts the internal and external validity of longitudinal research. *J Sch Health*. 2005;75(7):267-70.

- 1  
2  
3  
4  
5  
6 9. Livingston PM, Lee SE, McCarty CA, Taylor HR. A comparison of participants with  
7  
8 non-participants in a population-based epidemiologic study: The Melbourne  
9  
10 Visual Impairment Project. *Ophthalmic Epidemiol.* 1997;42(2):73-81.  
11  
12
- 13 10. Groves RM, Floyd J, Fowler JR, Couper JM, Singer E, Tourangeau R. *Survey*  
14  
15 methodology. Hoboken, NJ: Wiley; 2004.  
16  
17
- 18 11. Kalsbeek W, Heiss G. Building bridges between populations and samples in  
19  
20 epidemiological studies. *Annu Rev Public Health.* 2000;21(1):147-69.  
21  
22
- 23 12. Boardman HF, Thomas E, Ogden H, Croft PR, Millson DS. A method to determine  
24  
25 if consenters to population surveys are representative of the target study  
26  
27 population. *J Public Health.* 2005;27(2):212-4.  
28  
29
- 30 13. Dekkers OM, von Elm E, Algra A, Romijn JA, Vandenbroucke JP. How to assess  
31  
32 the external validity of therapeutic trials: a conceptual approach. *Int J Epidemiol.*  
33  
34 2010;39(1):89-94.  
35  
36
- 37 14. Torner A, Duberg AS, Dickman P, Svensson A. A Proposed Method to Adjust for  
38  
39 Selection Bias in Cohort Studies. *Am J Epidemiol.* 2010;171(5):602-8.  
40  
41
- 42 15. Jonsson S, Hedblad B, Engstrom G, Nilsson P, Berglund G, Janzon I. Influence of  
43  
44 obesity on cardiovascular risk. Twenty-three-year follow-up of 22 025 men from  
45  
46 an urban Swedish population. *Int J Obes.* 2002;26(8):1046-53.  
47  
48
- 49 16. Brewster DH, Stockton D, Harvey J, Mackay M. Reliability of cancer registration  
50  
51 data in Scotland, 1997. *Eur J Cancer.* 2002;38(3):414-7.  
52  
53  
54  
55  
56  
57  
58  
59  
60



- 1  
2  
3  
4  
5  
6 17. Molster C, Bower C, O'Leary P. Community attitudes to the collection and use of  
7  
8 identifiable data for health research—is it an invasion of privacy? Aust N Z J Public  
9  
10 Health. 2007;31(4):313-7.  
11  
12
- 13 18. Gershon AS, Tu JV. Data validity and coverage in the Danish National Health  
14  
15 Registry. A literature review. Can Med Assoc J. 2008;178(7):871-3.  
16  
17
- 18 19. Rothman KJ. The rise and fall of epidemiology, 1950 2000 AD. N Engl J Med.  
19  
20 1981;304(10):600-2.  
21  
22
- 23 20. Australian Institute of Health and Welfare. Diabetes prevalence in Australia: an  
24  
25 assessment of national data coverage. Diabetes series no14. Canberra: AIHW;  
26  
27 2009.  
28  
29
- 30 21. Australian Bureau of Statistics. Census of Population and Housing: Socio-  
31  
32 Economic Indexes for Areas (SEIFA). Canberra: ABS; 2004.  
33  
34
- 35 22. Alonso A, Seguí-Gómez M, de Irala J, Sánchez-Villegas A, Beunza J, Martínez-  
36  
37 Gonzalez MÁ. Predictors of follow-up and assessment of selection bias from  
38  
39 dropouts using inverse probability weighting in a cohort of university graduates.  
40  
41 Eur J Epidemiol. 2006;21(5):351-8.  
42  
43  
44
- 45 23. Coley N, Gardette V, Toulza O, Gillette-Guyonnet S, Cantet C, Nourhashemi F, et  
46  
47 al. Predictive factors of attrition in a cohort of Alzheimer disease patients.  
48  
49 Neuroepidemiology. 2008;31(2):69-79.  
50  
51  
52
- 53 24. Holden L, Ware RS, Passey M. Characteristics of nonparticipants differed based  
54  
55 on reason for nonparticipation: a study involving the chronically ill. J Clin  
56  
57 Epidemiol. 2008;61(7):728-32.  
58  
59  
60

- 1  
2  
3  
4  
5  
6 25. Galea S, Tracy M. Participation rates in epidemiologic studies. *Ann Epidemiol.*  
7  
8 2007;17(9):643-53.  
9
- 10  
11 26. Odierna DH, Schmidt LA. The Effects of Failing to Include Hard-to-Reach  
12  
13 Respondents in Longitudinal Surveys. *Am J Public Health.* 2009;99(8):1515-21.  
14  
15
- 16 27. Hazell ML, Morris JA, Linehan MF, Frank PI, Frank TL. Factors influencing the  
17  
18 response to postal questionnaire surveys about respiratory symptoms. *Prim Care*  
19  
20 *Respir J.* 2009;18(3):165-70.  
21  
22
- 23 28. Ware RS, Williams GM, Aird RL. Participants who left a multiple-wave cohort  
24  
25 study had similar baseline characteristics to participants who returned. *Ann*  
26  
27 *Epidemiol.* 2006;16(11):820-3.  
28  
29
- 30 29. Brilleman SL, Pachana NA, Dobson AJ. The impact of attrition on the  
31  
32 representativeness of cohort studies of older people. *BMC Med Res Methodol.*  
33  
34 2010;10(1):71-9.  
35  
36
- 37 30. Watson N, Wooden M. Identifying factors affecting longitudinal survey response.  
38  
39 In: Lynn P, editor. *Methodology of Longitudinal Surveys.* New York: Wiley; 2009.  
40  
41 p. 157-81.  
42  
43
- 44 31. Rojas NL, Sherrit L, Harris S, Knight JR. The Role of Parental Consent in  
45  
46 Adolescent Substance Use Research. *J Adolesc Health.* 2008;42(2):192-7.  
47  
48
- 49 32. Kho ME, Duffett M, Willison DJ, Cook DJ, Brouwers MC. Written informed  
50  
51 consent and selection bias in observational studies using medical records:  
52  
53 systematic review. *Br Med J.* 2009;338:b866.  
54  
55  
56  
57  
58  
59  
60

- 1  
2  
3  
4  
5  
6 33. Joshy G, Simmons D. Diabetes information systems: A rapidly emerging support  
7  
8 for diabetes surveillance and care. *Diabetes Technol Ther*. 2006;8(5):587-97.  
9  
10  
11 34. Nickelsen TN. Data validity and coverage in the Danish National Health Registry.  
12  
13 A literature review. *Ugeskr Laeger*. 2001;164(1):33-7.  
14  
15  
16 35. Choi BCK, Pak AWP. Understanding and minimizing epidemiologic bias in public  
17  
18 health research. *Revue Canadienne De Sante Publique*. 2005;96:284-6.  
19  
20  
21 36. Biemer PP, Lyberg L, Wiley J. Introduction to survey quality.  
22  
23 ed. Hoboken, NJ: Wiley Online Library; 2003.  
24  
25  
26 37. Blumberg SJ, Luke JV. Coverage bias in traditional telephone surveys of low-  
27  
28 income and young adults. *Public Opin Q*. 2007;71(5):734-49.  
29  
30  
31 38. Siddiqui O, Flay BR, Hu FB. Factors affecting attrition in a longitudinal smoking  
32  
33 prevention study. *Prev Med*. 1996;25(5):554-60.  
34  
35  
36 39. Che YH, Assanangkornchai S, McNeil E, Chongsuvivatwong V, Li JH, Geater A, et  
37  
38 al. Predictors of early dropout in methadone maintenance treatment program in  
39  
40 Yunnan province, China. *Drug Alcohol Rev*. 2010;29(3):263-70.  
41  
42  
43  
44  
45  
46  
47  
48  
49  
50  
51  
52  
53  
54  
55  
56  
57  
58  
59  
60

**Non-study registrants**

|                                                |                         |
|------------------------------------------------|-------------------------|
| Non-consenting registrants<br>N=75,347         |                         |
| Non-sampled consenting registrants<br>N=44,065 |                         |
| Non-participants<br>N=10,488                   | Participants<br>N=3,951 |

The four mutually exclusive groups of registrants  
190x253mm (300 x 300 DPI)

1  
2  
3  
4  
5  
6  
7  
8  
9  
10  
11  
12  
13  
14  
15  
16  
17  
18  
19  
20  
21  
22  
23  
24  
25  
26  
27  
28  
29  
30  
31  
32  
33  
34  
35  
36  
37  
38  
39  
40  
41  
42  
43  
44  
45  
46  
47  
48  
49  
50  
51  
52  
53  
54  
55  
56  
57  
58  
59  
60

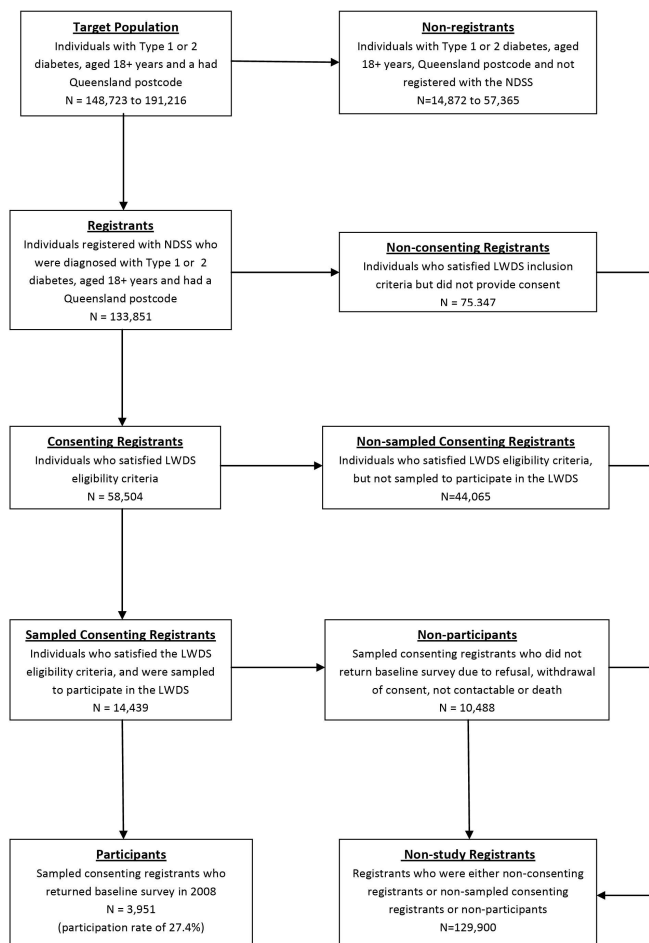

Participant flowchart in the Living with Diabetes Study  
209x296mm (300 x 300 DPI)

STROBE Statement—Checklist of items that should be included in reports of *cohort studies*

|                              | No | Recommendation                                                                                                                                                                                                                                                                                                                                                                                                                                                                                                                                                                                                                                                       |
|------------------------------|----|----------------------------------------------------------------------------------------------------------------------------------------------------------------------------------------------------------------------------------------------------------------------------------------------------------------------------------------------------------------------------------------------------------------------------------------------------------------------------------------------------------------------------------------------------------------------------------------------------------------------------------------------------------------------|
| <b>Title and abstract</b>    | 1  | (a) Indicate the study's design with a commonly used term in the title or the abstract<br><b>(See pages 1, 2 &amp; 3 of manuscript)</b><br><hr/><br>(b) Provide in the abstract an informative and balanced summary of what was done and what was found<br><b>(See pages 2 &amp; 3 of manuscript)</b>                                                                                                                                                                                                                                                                                                                                                                |
| <b>Introduction</b>          |    |                                                                                                                                                                                                                                                                                                                                                                                                                                                                                                                                                                                                                                                                      |
| Background/rationale         | 2  | Explain the scientific background and rationale for the investigation being reported<br><b>(See paragraph 1)</b>                                                                                                                                                                                                                                                                                                                                                                                                                                                                                                                                                     |
| Objectives                   | 3  | State specific objectives, including any prespecified hypotheses<br><b>(See paragraph 2)</b>                                                                                                                                                                                                                                                                                                                                                                                                                                                                                                                                                                         |
| <b>Methods</b>               |    |                                                                                                                                                                                                                                                                                                                                                                                                                                                                                                                                                                                                                                                                      |
| Study design                 | 4  | Present key elements of study design early in the paper<br><b>(See paragraph 2)</b>                                                                                                                                                                                                                                                                                                                                                                                                                                                                                                                                                                                  |
| Setting                      | 5  | Describe the setting, locations, and relevant dates, including periods of recruitment, exposure, follow-up, and data collection<br><b>(See paragraph 1)</b>                                                                                                                                                                                                                                                                                                                                                                                                                                                                                                          |
| Participants                 | 6  | (a) Give the eligibility criteria, and the sources and methods of selection of participants. Describe methods of follow-up<br><b>(See paragraph 1 &amp; data only collected from baseline survey)</b><br><hr/><br>(b) For matched studies, give matching criteria and number of exposed and unexposed<br><b>(Not applicable)</b>                                                                                                                                                                                                                                                                                                                                     |
| Variables                    | 7  | Clearly define all outcomes, exposures, predictors, potential confounders, and effect modifiers. Give diagnostic criteria, if applicable<br><b>(See paragraph 2)</b>                                                                                                                                                                                                                                                                                                                                                                                                                                                                                                 |
| Data sources/<br>measurement | 8* | For each variable of interest, give sources of data and details of methods of assessment (measurement). Describe comparability of assessment methods if there is more than one group<br><b>(See paragraph 1)</b>                                                                                                                                                                                                                                                                                                                                                                                                                                                     |
| Bias                         | 9  | Describe any efforts to address potential sources of bias<br><b>(See paragraph 1 i.e. randomly sampled from disease register)</b>                                                                                                                                                                                                                                                                                                                                                                                                                                                                                                                                    |
| Study size                   | 10 | Explain how the study size was arrived at<br><b>(Not reported in this study as outcomes associated with diabetes not an objective of this paper)</b>                                                                                                                                                                                                                                                                                                                                                                                                                                                                                                                 |
| Quantitative variables       | 11 | Explain how quantitative variables were handled in the analyses. If applicable, describe which groupings were chosen and why<br><b>(See paragraph 3)</b>                                                                                                                                                                                                                                                                                                                                                                                                                                                                                                             |
| Statistical methods          | 12 | (a) Describe all statistical methods, including those used to control for confounding<br><b>(Multivariate logistic analysis was used to control for potential confounders i.e. see paragraph 3)</b><br><hr/><br>(b) Describe any methods used to examine subgroups and interactions<br><b>(See paragraph 3)</b><br><hr/><br>(c) Explain how missing data were addressed<br><b>(Due to study's objectives, there was no need to incorporate or utilize any statistical adjustment for missing data).</b><br><hr/><br>(d) If applicable, explain how loss to follow-up was addressed<br><b>(See paragraph 2, for strategies to maximize participation at baseline)</b> |

1  
2  
3  
4  
5  
6  
7  
8  
9  
10  
11  
12  
13  
14  
15  
16  
17  
18  
19  
20  
21  
22  
23  
24  
25  
26  
27  
28  
29  
30  
31  
32  
33  
34  
35  
36  
37  
38  
39  
40  
41  
42  
43  
44  
45  
46  
47  
48  
49  
50  
51  
52  
53  
54  
55  
56  
57  
58  
59  
60

---

(e) Describe any sensitivity analyses  
(See paragraph 2 in Results section)

---

## Results

|                          |     |                                                                                                                                                                                                                                                                                                                                                                                                                                                                                                                |
|--------------------------|-----|----------------------------------------------------------------------------------------------------------------------------------------------------------------------------------------------------------------------------------------------------------------------------------------------------------------------------------------------------------------------------------------------------------------------------------------------------------------------------------------------------------------|
| Participants             | 13* | (a) Report numbers of individuals at each stage of study—eg numbers potentially eligible, examined for eligibility, confirmed eligible, included in the study, completing follow-up, and analysed<br>(See Figure 1)<br>(b) Give reasons for non-participation at each stage<br>(See paragraphs 2&3 for associations between baseline characteristics and participation status)<br>(c) Consider use of a flow diagram<br>(See Figure 1)                                                                         |
| Descriptive data         | 14* | (a) Give characteristics of study participants (eg demographic, clinical, social) and information on exposures and potential confounders<br>(See Table 1)<br>(b) Indicate number of participants with missing data for each variable of interest<br>(See Table 1)<br>(c) Summarise follow-up time (eg, average and total amount)<br>(Not applicable as only participation at baseline/wave 1 considered)                                                                                                       |
| Outcome data             | 15* | Report numbers of outcome events or summary measures over time<br>(See Table 1)                                                                                                                                                                                                                                                                                                                                                                                                                                |
| Main results             | 16  | (a) Give unadjusted estimates and, if applicable, confounder-adjusted estimates and their precision (eg, 95% confidence interval). Make clear which confounders were adjusted for and why they were included<br>(See Table 1 and paragraph 2)<br>(b) Report category boundaries when continuous variables were categorized<br>(See paragraph 3 in Methods and Table 1)<br>(c) If relevant, consider translating estimates of relative risk into absolute risk for a meaningful time period<br>(Not applicable) |
| Other analyses           | 17  | Report other analyses done—eg analyses of subgroups and interactions, and sensitivity analyses<br>(See paragraph 2)                                                                                                                                                                                                                                                                                                                                                                                            |
| <b>Discussion</b>        |     |                                                                                                                                                                                                                                                                                                                                                                                                                                                                                                                |
| Key results              | 18  | Summarise key results with reference to study objectives<br>(See paragraph 1, 2 & 3)                                                                                                                                                                                                                                                                                                                                                                                                                           |
| Limitations              | 19  | Discuss limitations of the study, taking into account sources of potential bias or imprecision. Discuss both direction and magnitude of any potential bias<br>(See paragraph 4)                                                                                                                                                                                                                                                                                                                                |
| Interpretation           | 20  | Give a cautious overall interpretation of results considering objectives, limitations, multiplicity of analyses, results from similar studies, and other relevant evidence<br>(See paragraphs 2,3 & 4)                                                                                                                                                                                                                                                                                                         |
| Generalisability         | 21  | Discuss the generalisability (external validity) of the study results<br>(See paragraph 4)                                                                                                                                                                                                                                                                                                                                                                                                                     |
| <b>Other information</b> |     |                                                                                                                                                                                                                                                                                                                                                                                                                                                                                                                |
|                          | 22  | Give the source of funding and the role of the funders for the present study and, if                                                                                                                                                                                                                                                                                                                                                                                                                           |

1 Funding applicable, for the original study on which the present article is based  
2  
3 (See funding statement in manuscript)  
4

---

5 \*Give information separately for exposed and unexposed groups.  
6

7  
8 **Note:** An Explanation and Elaboration article discusses each checklist item and gives methodological background and  
9 published examples of transparent reporting. The STROBE checklist is best used in conjunction with this article (freely  
10 available on the Web sites of PLoS Medicine at <http://www.plosmedicine.org/>, Annals of Internal Medicine at  
11 <http://www.annals.org/>, and Epidemiology at <http://www.epidem.com/>). Information on the STROBE Initiative is  
12 available at <http://www.strobe-statement.org>.  
13  
14  
15  
16  
17  
18  
19  
20  
21  
22  
23  
24  
25  
26  
27  
28  
29  
30  
31  
32  
33  
34  
35  
36  
37  
38  
39  
40  
41  
42  
43  
44  
45  
46  
47  
48  
49  
50  
51  
52  
53  
54  
55  
56  
57  
58  
59  
60

For peer review only
